# Supplementary material for: Attitudes and perceptions of medical students about family medicine in Spain: protocol for a cross-sectional survey
Source: PubMed Central journal article supplement — BMJ Open. 2011 Dec 21;1(2):e000231. doi: 10.1136/bmjopen-2011-000231 (PMC3278481; doi:10.1136/bmjopen-2011-000231), 2011-12-21
Supplement: bmjopen-2011-000231-s1.pdf [file bmjopen-2011-000231-s1.pdf]

## **INFORME DEL COMITÉ ÉTICO DE INVESTIGACIÓN CLÍNICA**

Gemma Rodriguez Palomar, secretaria del Comité Ético de Investigación Clínica de la Fundación Jordi Gol i Gurina.

### **CERTIFICA:**

Que este Comité en su reunión del día 29 de Noviembre de 2006, ha evaluado el proyecto de investigación **(P06/34)** titulado: " Percepciones y conocimientos de los estudiantes de medicina en relación con la atención primaria y medicina de familia" presentado por el Dr. Amando Martín Zurro.

Considerando que respeta los principios éticos y metodológicos para que pueda ser llevado a cabo, por lo que ha acordado dar su aprobación definitiva al proyecto anteriormente mencionado.

Lo que firmo en Barcelona a 12 de diciembre de 2006.
