# Supplementary material for: Attitudes and perceptions of medical students about family medicine in Spain: protocol for a cross-sectional survey
Source: PubMed Central journal article supplement — BMJ Open. 2011 Dec 21;1(2):e000231. doi: 10.1136/bmjopen-2011-000231 (PMC3278481; doi:10.1136/bmjopen-2011-000231), 2011-12-21
Supplement: bmjopen-2011-000231.draft_revisions.pdf [file bmjopen-2011-000231.draft_revisions.pdf]

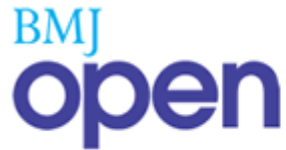

**Perceptions and knowledge of medical students about primary care and family practice in Spain: Protocol for a cross-sectional study**

|                                 |                                                                                                                                                                                                                                                                                                                                                                                                                                                                                                                                                                                                                                                                                                                                      |
|---------------------------------|--------------------------------------------------------------------------------------------------------------------------------------------------------------------------------------------------------------------------------------------------------------------------------------------------------------------------------------------------------------------------------------------------------------------------------------------------------------------------------------------------------------------------------------------------------------------------------------------------------------------------------------------------------------------------------------------------------------------------------------|
| Journal:                        | <i>BMJ Open</i>                                                                                                                                                                                                                                                                                                                                                                                                                                                                                                                                                                                                                                                                                                                      |
| Manuscript ID:                  | bmjopen-2011-000231                                                                                                                                                                                                                                                                                                                                                                                                                                                                                                                                                                                                                                                                                                                  |
| Article Type:                   | Protocol                                                                                                                                                                                                                                                                                                                                                                                                                                                                                                                                                                                                                                                                                                                             |
| Date Submitted by the Author:   | 23-Jun-2011                                                                                                                                                                                                                                                                                                                                                                                                                                                                                                                                                                                                                                                                                                                          |
| Complete List of Authors:       | Martín-Zurro, Amando; Servicio Catalán de la Salud, División de Planificación y Evaluación Operativa<br>Jiménez Villa, Josep; Servicio Catalán de la Salud, División de Planificación y Evaluación Operativa<br>Monreal Hajar, Antonio; Catedra UNIZAR-Novartis de Docencia e Investigación en Medicina de Familia y Atención Primaria, Universidad de Zaragoza<br>Mundet Tuduri, Xavier; Catedra UAB-Novartis de Docencia e Investigación en Medicina de Familia, Universitat Autònoma de Barcelona<br>Otero Puime, Ángel; Cátedra UAM-Novartis de doencia e Investigación en Medicina de Familia y Atención Primaria, Universidad Autónoma de Madrid<br>Alonso-Coello, Pablo; Iberoamerican Cochrane Centre, CIBERESP-IIB Sant Pau |
| <b>Primary Subject Heading</b>: | General practice & family medicine                                                                                                                                                                                                                                                                                                                                                                                                                                                                                                                                                                                                                                                                                                   |
| Keywords:                       | EDUCATION & TRAINING (see Medical Education & Training), EPIDEMIOLOGY, PRIMARY CARE                                                                                                                                                                                                                                                                                                                                                                                                                                                                                                                                                                                                                                                  |
|                                 |                                                                                                                                                                                                                                                                                                                                                                                                                                                                                                                                                                                                                                                                                                                                      |

SCHOLARONE™  
Manuscripts

1  
2  
3  
4  
5  
6  
7  
8  
9  
10  
11  
12  
13  
14  
15  
16  
17  
18  
19  
20  
21  
22  
23  
24  
25  
26  
27  
28  
29  
30  
31  
32  
33  
34  
35  
36  
37  
38  
39  
40  
41  
42  
43  
44  
45  
46  
47  
48  
49

Amando Martín Zurro<sup>1,2</sup>, Josep Jiménez Villa<sup>1,2,3</sup>, Antonio Monreal Hajar<sup>4</sup>, Xavier Mundet Tuduri<sup>3</sup>, Ángel Otero Puime<sup>5</sup>, Alonso-Coello P<sup>6</sup>, for the Universidad y Medicina de Familia (UNIMEDFAM) research group.

1. Servicio Catalán de la Salud, División de Planificación y Evaluación Operativa
2. Institut Universitari d'Investigació en Atenció Primària Jordi Gol (IDIAP Jordi Gol), Gran Via 587 àtic, Barcelona, Spain
3. Càtedra UAB-Novartis de Docència e Investigació en Medicina de Família, Universitat Autònoma de Barcelona, Barcelona, Spain
4. Càtedra UNIZAR-Novartis de Docència e Investigació en Medicina de Família y Atención Primaria, Universidad de Zaragoza, Zaragoza, Spain
5. Càtedra UAM-Novartis de Docència e Investigació en Medicina de Família y Atención Primaria, Universidad Autónoma de Madrid, Spain
6. Iberoamerican Cochrane Centre, CIBERESP-IIB Sant Pau, Barcelona, Spain.

- a.martinzurro@gencat.cat
- jojimenez@catsalut.cat
- 16274xmt@comb.cat
- angel.otero@uam.es
- amonreal@salud.aragon.es
- palonso@santpau.cat

#### **UNIVERSIDAD Y MEDICINA DE FAMILIA (UNIMEDFAM) research group:**

Amando Martín Zurro, Josep Jiménez Villa, Antonio Monreal Hajar, Xavier Mundet Tuduri, Ángel Otero Puime, Pablo Alonso-Coello, Cristina Aguado Taberné, Pablo Bonal Pitz, Francisco Buitrago Ramírez, Concepción Carratalá Munera, Verónica Casado, Vicente, María Teresa Delgado Marroquin, Ramón Descarrega Queralt, Manuel Gálvez Ibáñez, Antonio J. García Ruiz, Luís García Olmos, Vicente Francisco Gil Guillén, José Manuel Iglesias Sanmartin, Carmelo Jiménez Mena, Emilio Lara Valdivieso, Inés Lizaga Castellón, Antonio de Lorenzo-Cáceres Ascanio, Jorge Martínez de la Iglesia, Flora Martínez Pecino, Juan Francisco Menárguez Puche, M. Pilar Navarrete Durán, Jorge Navarro Pérez, Domingo Orozco Beltran, Eduard Peñascal Pujol, José Ramón Rodríguez Borges, Pilar Rodríguez Ledo, Juan Alfonso Romero Furones, Mercedes Sánchez Martínez, Juana Agustina Santana Caballero, Orlando Segura Álamo, Antonio Solbes Caro, José Zarco Montejo.

**Corresponding author:** Amando Martín Zurro Institut Universitari d'Investigació en Atenció Primària Jordi Gol (IDIAP Jordi Gol), Gran Via 587 àtic. 08007 Barcelona, Spain; a.martinzurro@gencat.cat

1  
2  
3  
4  
5  
6  
7  
8  
9  
10  
11  
12  
13  
14  
15  
16  
17  
18  
19  
20  
21  
22  
23  
24  
25  
26  
27  
28  
29  
30  
31  
32  
33  
34  
35  
36  
37  
38  
39  
40  
41  
42  
43  
44  
45  
46  
47  
48  
49

Despite the fact that family medicine has taken root as a specialty in the past 25 years, this has not been reflected in the inclusion of the specialty in the majority of medical schools in Spain. Almost 40% of the students will work in Primary Care but, in spite of this, most universities don't have an obligatory assignment as such. There are only specific practice periods in health centres or some optional course that offers few credits.

### **OBJECTIVES**

To explore the information about Primary Care that medical students in Spain have, their perception of the role of Family Practice in the health system, their expectations for professional practice and preference for the speciality they wish to follow, and their opinion of the usefulness and necessity of their acquired knowledge of Primary Care and Family Practice.

### **METHODS**

A descriptive study that consists of the repetition of cross-sectional surveys every two years. Each one of the different analyses will consist of two surveys: one for all the students in the 1st, 3rd and 5th years of medical school in all the Spanish schools of medicine asking about their knowledge, perceptions and attitudes in relation to Primary Care and Family Practice, and a second one for the coordinating professors of the study in each University about the educational activities related to Primary Care and Family Practice that are carried out in their centres. The repetition of the study every two years will allow for an analysis of the evolution of the cohort of students until they receive their degree, and the changes that take place in them during their stay in medical school.

This study will provide useful information for strategic planning decisions, content and educational methodology in the medical schools, so that they may adapt their curricula to the new needs and social expectations. It will also assist them in evaluating this

For peer review only - <http://bmjopen.bmj.com/site/about/guidelines.xhtml>

**Article focus:**

This survey will evaluate the knowledge and perception about Family Practice of the medical students in Spain.

The study will explore the potential influence of the Family Practice curriculum in the student's opinions?

**Strengths and limitations:**

The design of this study has several strengths. One is the completion of the questionnaire in the classroom, in paper format, during some of the students' training sessions. In this way we should obtain a high response rate. The working group for this study includes professionals from 22 of the 27 universities throughout Spain, which should bring the total number of surveyed individuals to over 10,000, making this the largest study on this subject internationally. This sample size and the expected high response rate will make the study be a representative assessment of the present situation in Spain.

The principal limitations of this study are related to its design, which bases data collection on opinion surveys, and this introduces subjectivity. Secondly, the percentage of replies could still be low, and also vary according to medical school and specific items.

Family medicine (FM) has become consolidated as a specialty in the past 25 years [1, 2]. This transformation and adaptation has not been reflected in the inclusion of the specialty, either as a course of study or area of knowledge, in the majority of medical schools in Spain [3,4]. This is a marked difference from what has occurred in other Western countries, in which the presence of FM and primary care (PC) has been consolidated and acknowledged for decades. Despite the fact that almost 40% of the students is going to work in PC, the majority of universities do not have an obligatory assignment as such, and the presence of this training is limited to a few practice sessions in a health centre or an optional course that offers few credits.

At the moment there is no Department of Family Medicine in Spanish medical schools, and the presence of this subject is scarce, to say the least [5,6]. This is true not only in quantitative terms but in qualitative terms as well, when one takes into account its importance and presence in health care services and Spanish society as a whole. Starting in the 1980s some Spanish schools of medicine have offered their students practice sessions in the consults of family medicine physicians, which are complemented with seminars imparted by associate professors in the university health centres. [7,8] Since then, Spanish universities have slowly started to introduce FM in the curricula and at present 25 of the 27 schools of medicine have some type of teaching in FM [9,4]. Three universities have family and community medicine as an obligatory assignment, 7 offer it as an optional course, 17 require obligatory practice sessions, and 12 require optional practice sessions. Spanish universities now have 157 university health centres, with 153 professors in teaching and research, of which 4 are full professors and 147 are associate professors, as well as 300 honorary professors. For a few years there have been two Chairs, with their corresponding directors [4]. In general, when looking at Spain's European neighbours, it is easy to realize that there are evident differences in the universities' medical curricula, which stress a series of characteristics of FM, such as continuous care of patients and holistic health focus, and are oriented to the individual, the family and the community.

medicine in Spain are not presently well known. Two studies have been done thus far [10,11]. In the first one Menárguez Puche surveyed 216 medical students to learn their opinions about FM and its importance in undergraduate medical studies. Results showed that only 1.4% of those surveyed had FM as a first choice, whereas 48.1% was considering it as an alternative choice. On the other hand, 35.2% of the students answered that they would only choose it if they could not get into other specialties, and 15.3% said they would never choose it. It is interesting to note the discordance between what the students believe to be the importance the university gives to FM and the low importance that they themselves give to it. Nevertheless, that low importance is in accordance with their choices for postgraduate specialization. The authors conclude that FM continues to be little known by Spanish medical students, which makes them not see it as a viable choice for postgraduate study [10]. Also recently, Escobar Rabadan surveyed medical students at the beginning and end of a course on PC [11]. A total of 44 students out of the 88 surveyed answered the questionnaire. The objective of the study was to learn what sociodemographic and academic variables of medical students are associated with a better knowledge and attitude to FM, before and after finishing a course on PC. Results showed that the only variable that was associated was gender, with women, especially younger women, showing the most favourable attitudes toward FM and PC.

The international literature also has few studies on this subject, either before or after the end of undergraduate study. However, attitude has been studied in various international studies, especially by Anglo-Saxon universities [12,13,14,15,16,17]. In general the available information shows that the attitude of medical students toward FM improves as they progress in the school of medicine, and that it is proportionately related with the degree of contact they have with FM during their undergraduate training [18,19,20,21,17]. In a study done in the United Kingdom, the attitude of medical students

toward FM as a specialty and toward family physicians was analysed [15]. The students reflected a positive attitude toward both and listed their personal experience with family

physicians as the most influential factor on their attitude. The attitude of the students

of study, with FM being the only specialty to show an improvement during the course of study.

The reasons for which students choose a specific specialty for training and future practice are complex. Different factors have shown an association with the selection of FM: the desire to practice a specialty with multiple branches, social orientation, characteristics of the medical school the student attends, characteristics such as hours and aspects related to the volume and qualities of the work (expected salary, prestige, possibility of finding work, follow-up of patients, etc.), and personal interaction [22,23,16,24]. In general, students see themselves as generalists or specialists from the moment they enter medical school. Different studies have shown that, although there is a margin for variation in the selection of the future specialty, the preferred choice at the moment of entering medical school is a key predictive factor. For this reason a high percentage of students end up choosing a specialty that is closely related to the one they preferred when they entered medical school.

Within this context and given the scarce information on this subject in Spain we have designed a longitudinal study that would allow us to evaluate the potential impact of medical school teaching on the final profiles of students, both in perceptions and expectations and in the choice of specialty.

**METHODS**

This is an observational quantitative study with follow-up, and this proposal refers to the initial observation and the first follow-up after two years. Each follow-up survey will consist of two questionnaires: the first is a questionnaire given to students in different courses of the Spanish medical school undergraduate curricula, asking about their knowledge, perceptions and attitudes on PC and FM; the other questionnaire will be

For peer review only - <http://bmjopen.bmj.com/site/about/guidelines.xhtml>

given to the professors who coordinate the study in each of the medical schools and will ask them about teaching activity related to PC and FM in each one. The repetition of the surveys every two years will allow for an analysis of the evolution of the student cohort

1  
2  
3  
4  
5  
6  
7  
8  
9  
10  
11  
12  
13  
14  
15  
16  
17  
18  
19  
20  
21  
22  
23  
24  
25  
26  
27  
28  
29  
30  
31  
32  
33  
34  
35  
36  
37  
38  
39  
40  
41  
42  
43  
44  
45  
46  
47  
48  
49

study. We will additionally put together a systematic review of the available literature on this topic.

## **Subjects**

The study subjects will be all students in the first, third and fifth year of study of Medicine and Surgery in all Spanish medical schools (approximately between 12,000 and 14,000 students). At the same time, a survey will be taken by the study's local coordinating professors in each medical school (1 or 2 professors per school).

## **Student questionnaire**

### ***Design of the questionnaire***

The instrument of measure will be a specifically designed questionnaire made up of a series of items that will be evaluated on a scale similar to a Likert scale, with some open questions. A list of items will be obtained from the literature review, such as attitudes, perceptions, specialty preference, and demographic characteristics. With these items we will develop the first version of the questionnaire. A pilot study will be done with students in different years of medical school in Barcelona, Madrid, Alicante and Zaragoza in order to validate the questionnaire and verify that it is adequate and well accepted. The final version will be developed based on the results of the pilot study.

The questionnaire will also collect information on the student characteristics that the literature review shows are related to attitudes and opinions about PC and FM.

### ***Data collection***

Data collection will take place close to the beginning of the second four month period of the academic year. The completion of the questionnaire will be done in the classroom, in paper format, taking advantage of training sessions for the students. In some specific cases it will also be possible to respond via the Internet through the following website:

[www.surveymonkey.com](http://www.surveymonkey.com).

For peer review only - <http://bmjopen.bmj.com/site/about/guidelines.xhtml>

### **Questionnaire for local coordinators**



coordinators of the study. These coordinators will answer a specific questionnaire about teaching and other activity related to PC and FM that is taking place in their local school during the present academic year.

### Data analysis

A descriptive analysis of the answers will be undertaken, both by groups and individually, for each of the study years. Proportions will be used for categorical variables and means, and standard deviations for quantitative variables. Variability according to medical school and study year will be analyzed, both via variability quotients and also by comparing the different strata with the Chi-squared test and analysis of variance.

The existence of an association between the questionnaire scores and each of its dimensions will also be analyzed. This will be done by looking at the students' individual characteristics and comparing them to teaching activity related to PC and FM in the different medical schools. This analysis will use both bivariate procedures (Chi-squared test, analysis of variance) as well as multivariate ones. A multiple linear regression will be done, with the survey scores and dimension scores as dependent variables, and the rest of the variables being considered descriptive. The selection of variables will be done step by step from an initial model formed by variables with a bivariate association with dependent variables of  $p \leq 0.20$ . The dependent variables will then be dichotomized and the analysis will be repeated through logistic regression.

After the second survey two years later the same analyses will take place and in addition the evolution of the questionnaire scores and activity related to PC and FM will be analyzed by comparing the results with those of the students in the same year of study (first, third and fifth), and also by comparing the evolution of results from those who were originally in the first and third years. This will be done through Chi-squared tests and analysis of variance.

1  
2  
3  
4  
5  
6  
7  
8  
9  
10  
11  
12  
13  
14  
15  
16  
17  
18  
19  
20  
21  
22  
23  
24  
25  
26  
27  
28  
29  
30  
31  
32  
33  
34  
35  
36  
37  
38  
39  
40  
41  
42  
43  
44  
45  
46  
47  
48  
49

The proposed study has been designed to evaluate the forementioned characteristics at the beginning of medical training and throughout time. Given its sample size (number of medical schools and students) and the fact that it implies a follow-up of the students, this project will provide relevant information which is presently not available in the international literature. The results this study will generate in the next few years will provide information about the evolution of perceptions about FM and PC as a specialty when students start medical school (knowledge and attitudes). They will also assist in analyzing the relation of different factors to perception and the final choice of FM as a specialty.

### Study's limitations

The principal limitations of this study are related to its design, which bases data collection on opinion surveys, and this introduces subjectivity. Secondly, the percentage of replies can be generally low, and also vary according to medical school and specific items, which can introduce a bias. The role of the coordinating professors in each medical school is essential in order to reduce the number of unanswered questionnaires. Another difficulty, since the questionnaire is anonymous, is the impossibility of evaluating at an individual level the evolution over time of the assessed characteristics and dimensions.

### Study's strengths

The design of this study has various strengths. One of the principal ones is the completion of the questionnaire in the classroom, in paper format, during some of the students' training sessions. In this way we should obtain a high response rate, with few students not responding. Also, in specific cases it will also be possible to respond via the Internet, which will increase the response rate. The work team for this study includes professionals from 22 of the 27 universities throughout Spain, which should bring the total number of surveyed individuals to over 10,000, making this the largest study on this subject internationally. This sample size and the expected high response

### Implications

This national survey will provide information on the degree of knowledge that medical students in Spain have about PC, and their perception of its role and that of FM in the health system. It will also allow us to assess their opinion on its usefulness, and the need for specific training in PC and FM at the undergraduate level. For these reasons we believe that the results of this study will provide valuable information for curriculum development related to PC in the different Schools of Medicine, and will help to prioritize those activities that will be most effective for promoting this specialty in Spain.

For peer review only

- 1  
2  
3  
4  
5  
6  
7  
8  
9  
10  
11  
12  
13  
14  
15  
16  
17  
18  
19  
20  
21  
22  
23  
24  
25  
26  
27  
28  
29  
30  
31  
32  
33  
34  
35  
36  
37  
38  
39  
40  
41  
42  
43  
44  
45  
46  
47  
48  
49
1. Barber Pérez P, González López-Valcárcel B: **Oferta y necesidad de especialistas médicos en España (2008-2025)**. Ministerio de Sanidad y Consumo; Marzo 2009.
2. Martín Zurro A, Cano Pérez JF: **Docencia en Atención Primaria y medicina de familia. En Atención Primaria. Conceptos, organización y práctica clínica**. Martín Zurro A y Cano Pérez JF (eds). Elsevier España. 5ª edición. Madrid ; 2003.
3. Menárguez Puche JF, Tudela deGea MB, Hernández Sánchez JM, García-Estañ J: **Medicina de familia y Universidad, ¿cómo lo ven los estudiantes?**. *Aten Primaria* 2010, **42**:303-4.
4. Bonal Pitz P, Casado Vicente V: **La medicina de familia como disciplina académica y la atención primaria como entorno de aprendizaje**. *Aten Primaria* 2004, **34**(8):433-6.
5. Menarguez Puche JF, Gomez-Calcerrada Berrocal D, Gonzalez Diaz M, Saura Llamas J: **Undergraduate teaching of primary health care. A Delphi study**. *Aten Primaria* 1992, **10**(7):876-9.
6. Zarco Montejo J: **Situación de la medicina de familia en la universidad española y europea**. *Revista de la Sociedad Madrileña de Medicina de Familia y Comunitaria* 2005, **7**(2):8-16.
7. De Lorenzo-Cáceres A, Otero A, Calvo E, Engel JL: **Contacto precoz del alumno con el paciente en atención primaria. Una experiencia de aprendizaje basada en la resolución de problemas**. *Educación Médica* 1998, **1**:24-31
8. De Lorenzo-Caceres A, Otero A, Calvo Corbella E. **Clinical practice for medical students at health centres: teaching possibilities of the web at the Unit of Family Medicine and Primary Care of the Autonomous University of Madrid**. *Aten Primaria* 2005;**35**(7):372-4
9. Gil VF, Quirce F, Orozco D, Uris J, Simon-Talero M, Merino J. **Opinion of university professors on the suitability of specific primary care training in medical students**. *Aten Primaria* 1995;**15**(3):179-82.

*Aten Primaria* 2009. [Epub ahead of print]

11. Escobar Rabadán F, López-Torres Hidalgo J. **¿Qué características de los estudiantes de medicina se relacionan con mejores conocimientos y actitudes hacia la medicina de familia?** *Aten Primaria* 2009; **41**(8):431-6.
12. Garrett EA, Dietrich AJ. **Students' evolving attitudes toward family medicine and specialty choices at one medical school.** *Acad Med* 1991;**66**(10):625-7.
13. Grayson MS, Newton DA, Whitley TW. **First-year medical students' knowledge of and attitudes toward primary care careers.** *Fam Med* 1996;**28**(5):337-42.
14. Lynch DC, Newton DA, Grayson MS, Whitley TW. **Influence of medical school on medical students' opinions about primary care practice.** *Acad Med* 1998;**73**(4):433-5.
15. Henderson E, Berlin A, Fuller J. **Attitude of medical students towards general practice and general practitioners.** *Br J Gen Pract* 2002;**52**(478):359-63.
16. Wright B, Ian Scott, Wayne Woloschuk, Fraser Brenneis. **Career choice of new medical students at three Canadian universities: family medicine versus specialty medicine.** *CMAJ* 2004;**170**(13):1920-4
17. Miettola J, Mantyselka P, Vaskilampi T. **Doctor-patient interaction in Finnish primary health care as perceived by first year medical students.** *BMC Med Educ* 2005;**5**(1):34.
18. Ochoa-Diaz Lopez H. **Medical curricula and students' attitudes towards general and family practice in Mexico.** *Med Educ* 1987;**21**(3):189-98.
19. Morrison JM, Murray TS. **Career preferences of medical students: influence of a new four-week attachment in general practice.** *Br J Gen Pract* 1996;**46**(413):721-5
20. Kalantan K, Pyrne N, Al-Faris E, Al-Taweel A, Al-Rowais N, Abdul Ghani H, Eldin Magzoub M. **Students' perceptions towards a family medicine attachment experience.** *Educ Health (Abingdon)* 2003;**16**(3):357-65.

Dunedin School of Medicine: how has it influenced the attitudes of medical students to a career in rural general practice? *N Z Med J* 2003;**116**(1179):U537.

BMJ Open

22. Mann MP. **Attitudes toward and subsequent career choice of family practice: a weak relationship.** *Fam Med* 1994;**26**(8):504-8.

23. Senf JH, Campos-Outcalt D, Kutob R. **Factors related to the choice of family medicine: a reassessment and literature review.** *J Am Board Fam Pract* 2003 Nov-Dec;**16**(6):502-12.

24. Tolhurst H, Stewart M. **Becoming a GP--a qualitative study of the career interests of medical students.** *Aust Fam Physician* 2005;**34**(3):204-6.

For peer review only

**General objectives:**

1. To learn the degree of information of medical students in Spain about Primary Care, and their perception of its role and that of Family Medicine within the health system.
2. To learn the opinion of medical students in Spain on the usefulness and need for specific training in Primary Care and Family Medicine at the undergraduate level.
3. To determine the evolution throughout time of the degree of information and opinion of medical students in Spain on Primary Care and their perception of its role and that of Family Medicine within the health system.

**Specific objectives:**

1. In relation to the degree of information that Spanish medical students have about Primary Care and their perception of its role and that of Family Medicine within the health system, and their opinion on the usefulness and need for specific training in Primary Care and Family Medicine at the undergraduate level:
  - To determine the degree of variability in relation to the year of study the student is in
  - To determine the degree of variability in relation to the medical school
  - To determine what student characteristics are associated with information, perception and opinion
  - To evaluate if information, perception and opinion are related to training activity in Primary Care during the period of study
2. To learn exactly what teaching activity, both theoretical and practical and related to Primary Care is offered in Spanish schools of medicine
3. To describe the expectations for professional practice of medical students in relation

4. To determine the characteristics associated with the choice of Family Medicine as a specialty

5. To evaluate the viability of electronic surveys

For peer review only

1  
2  
3  
4  
5  
6  
7  
8  
9  
10  
11  
12  
13  
14  
15  
16  
17  
18  
19  
20  
21  
22  
23  
24  
25  
26  
27  
28  
29  
30  
31  
32  
33  
34  
35  
36  
37  
38  
39  
40  
41  
42  
43  
44  
45  
46  
47  
48  
49



## Figure legends

**Figure 1.** Study design flowchart

## Abbreviations

PC: primary care, FM: family medicine

## Competing interests

The authors declare that they have no competing interests.

## Authors' contributions

AMZ, JJV and PAC participated in the conception and design of the protocol and drafted a first version. All authors participated, revising it critically for important intellectual content and have given final approval of the version to be published.

## Acknowledgements

We would like to thank Carmen Llenas for her help with the running of the study.

## Sources of funding

This project is funded with a grant from the Instituto de Salud Carlos III, Ministerio de Sanidad, Spain (PI070975). PAC is funded by a Miguel Servet contract by the Instituto de Salud Carlos III (CP09/00137).

1  
2  
3  
4  
5  
6  
7  
8  
9  
10  
11  
12  
13  
14  
15  
16  
17  
18  
19  
20  
21  
22  
23  
24  
25  
26  
27  
28  
29  
30  
31  
32  
33  
34  
35  
36  
37  
38  
39  
40  
41  
42  
43  
44  
45  
46  
47  
48  
49  
50  
51  
52  
53  
54  
55  
56  
57  
58  
59  
60

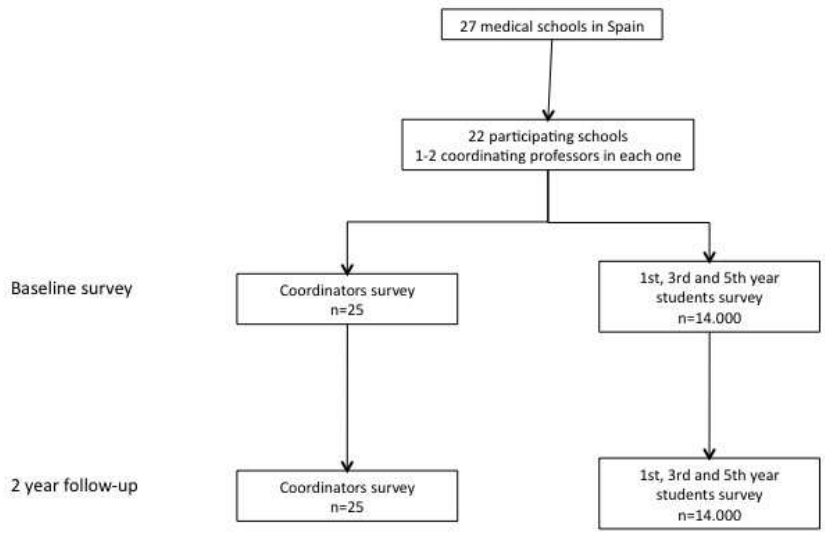

254x190mm (72 x 72 DPI)

ew only

**Research Checklist**

We followed the “Good practice in the conduct and reporting of survey research” guidance to prepare this protocol.

For peer review only

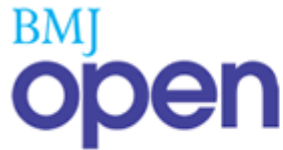

**Attitudes and perceptions of medical students about primary care and family practice in Spain: Protocol for a cross-sectional survey**

|                                 |                                                                                                                                                                                                                                                                                                                                                                                                                                                                                                                                                                                                                                                                                                                                      |
|---------------------------------|--------------------------------------------------------------------------------------------------------------------------------------------------------------------------------------------------------------------------------------------------------------------------------------------------------------------------------------------------------------------------------------------------------------------------------------------------------------------------------------------------------------------------------------------------------------------------------------------------------------------------------------------------------------------------------------------------------------------------------------|
| Journal:                        | <i>BMJ Open</i>                                                                                                                                                                                                                                                                                                                                                                                                                                                                                                                                                                                                                                                                                                                      |
| Manuscript ID:                  | bmjopen-2011-000231.R1                                                                                                                                                                                                                                                                                                                                                                                                                                                                                                                                                                                                                                                                                                               |
| Article Type:                   | Protocol                                                                                                                                                                                                                                                                                                                                                                                                                                                                                                                                                                                                                                                                                                                             |
| Date Submitted by the Author:   | 11-Aug-2011                                                                                                                                                                                                                                                                                                                                                                                                                                                                                                                                                                                                                                                                                                                          |
| Complete List of Authors:       | Martín-Zurro, Amando; Servicio Catalán de la Salud, División de Planificación y Evaluación Operativa<br>Jiménez Villa, Josep; Servicio Catalán de la Salud, División de Planificación y Evaluación Operativa<br>Monreal Hajar, Antonio; Catedra UNIZAR-Novartis de Docencia e Investigación en Medicina de Familia y Atención Primaria, Universidad de Zaragoza<br>Mundet Tuduri, Xavier; Catedra UAB-Novartis de Docencia e Investigación en Medicina de Familia, Universitat Autònoma de Barcelona<br>Otero Puime, Ángel; Cátedra UAM-Novartis de doencia e Investigación en Medicina de Familia y Atención Primaria, Universidad Autónoma de Madrid<br>Alonso-Coello, Pablo; Iberoamerican Cochrane Centre, CIBERESP-IIB Sant Pau |
| <b>Primary Subject Heading</b>: | General practice & Family practice                                                                                                                                                                                                                                                                                                                                                                                                                                                                                                                                                                                                                                                                                                   |
| Keywords:                       | EDUCATION & TRAINING (see Medical Education & Training), EPIDEMIOLOGY, PRIMARY CARE                                                                                                                                                                                                                                                                                                                                                                                                                                                                                                                                                                                                                                                  |
|                                 |                                                                                                                                                                                                                                                                                                                                                                                                                                                                                                                                                                                                                                                                                                                                      |

SCHOLARONE™  
Manuscripts

1  
2  
3  
4  
5  
6  
7  
8  
9  
10  
11  
12  
13  
14  
15  
16  
17  
18  
19  
20  
21  
22  
23  
24  
25  
26  
27  
28  
29  
30  
31  
32  
33  
34  
35  
36  
37  
38  
39  
40  
41  
42  
43  
44  
45  
46  
47  
48  
49  
50  
51  
52  
53  
54  
55  
56  
57  
58  
59  
60

**Research Checklist**

We followed the “Good practice in the conduct and reporting of survey research” guidance to prepare this protocol.

For peer review only

Amando Martín Zurro<sup>1,2</sup>, Josep Jiménez Villa<sup>1,2,3</sup>, Antonio Monreal Hajar<sup>4</sup>, Xavier Mundet Tuduri<sup>3</sup>, Ángel Otero Puime<sup>5</sup>, Alonso-Coello P<sup>6</sup>, for the Universidad y Medicina de Familia (UNIMEDFAM) research group.

1. Servicio Catalán de la Salud, División de Planificación y Evaluación Operativa
2. Institut Universitari d'Investigació en Atenció Primària Jordi Gol (IDIAP Jordi Gol), Gran Via 587 àtic, Barcelona, Spain
3. Càtedra UAB-Novartis de Docència e Investigació en Medicina de Família, Universitat Autònoma de Barcelona, Barcelona, Spain
4. Càtedra UNIZAR-Novartis de Docència e Investigació en Medicina de Família y Atención Primaria, Universidad de Zaragoza, Zaragoza, Spain
5. Càtedra UAM-Novartis de Docència e Investigació en Medicina de Família y Atención Primaria, Universidad Autónoma de Madrid, Spain
6. Iberoamerican Cochrane Centre, CIBERESP-IIB Sant Pau, Barcelona, Spain.

- a.martinzurro@gencat.cat
- jojimenez@catsalut.cat
- 16274xmt@comb.cat
- angel.otero@uam.es
- amonreal@salud.aragon.es
- palonso@santpau.cat

**UNIVERSIDAD Y MEDICINA DE FAMILIA (UNIMEDFAM) research group:**

Amando Martín Zurro, Josep Jiménez Villa, Antonio Monreal Hajar, Xavier Mundet Tuduri, Ángel Otero Puime, Pablo Alonso-Coello, Cristina Aguado Taberné, Pablo Bonal Pitz, Francisco Buitrago Ramírez, Concepción Carratalá Munera, Verónica Casado, Vicente, María Teresa Delgado Marroquin, Ramón Descarrega Queralt, Manuel Gálvez Ibáñez, Antonio J. García Ruiz, Luís García Olmos, Vicente Francisco Gil Guillén, José Manuel Iglesias Sanmartin, Carmelo Jiménez Mena, Emilio Lara Valdivieso, Inés Lizaga Castillón, Antonio de Lorenzo-Cáceres Ascanio, Jorge Martínez de la Iglesia, Flora Martínez Pecino, Juan Francisco Menárguez Puche, M. Pilar Navarrete Durán, Jorge Navarro Pérez, Domingo Orozco Beltran, Eduard Peñascal Pujol, José Ramón Rodríguez Borges, Pilar Rodríguez Ledo, Juan Alfonso Romero Furones, Mercedes Sánchez Martínez, Juana Agustina Santana Caballero, Orlando Segura Álamo, Antonio Solbes Caro, José Zarco Montejo.

**Corresponding author:** Amando Martin Zurro Institut Universitari d'Investigació en Atenció Primària Jordi Gol (IDIAP Jordi Gol), Gran Via 587 àtic. 08007 Barcelona, Spain; a.martinzurro@gencat.cat

1  
2  
3  
4  
5  
6  
7  
8  
9  
10  
11  
12  
13  
14  
15  
16  
17  
18  
19  
20  
21  
22  
23  
24  
25  
26  
27  
28  
29  
30  
31  
32  
33  
34  
35  
36  
37  
38  
39  
40  
41  
42  
43  
44  
45  
46  
47  
48  
49

Despite the fact that family medicine has become established as a specialty in the past 25 years, this has not been reflected in the inclusion of the specialty in the majority of medical schools in Spain. Almost 40% of the students will work in Primary Care but, in spite of this, most universities don't have an assessed placement as such. There are only specific practice periods in health centres or some student selected components with little weight in the overall curricula.

Deleted: taken root

Deleted: established

Comment [??1]: We meant that they could finish medical school without having been in touch with primary care. It is not compulsory.

Deleted: obligatory assignment

Deleted: (ref)

Deleted: optional course

Deleted: that offers few credits.

Deleted: explore

Deleted: the information

Deleted: that medical students in Spain have, their perception

Deleted: of

**OBJECTIVES**

To evaluate the attitudes and perceptions of medical students about Primary Care, and about the role of Family Practice in the health system. To assess the perception of medical students about the need for specific training in Family Medicine in the undergraduate level. To review what teaching activity in Family Medicine is offered across the Spanish Schools of medicine.

Deleted: , their expectations for professional practice and preference for the speciality they wish to follow, and their opinion of attitude towards its the usefulness and needcessity of their acquired knowledge about of Primary Care and Family Practice.

Deleted: study that consists of the

Deleted: tion

Deleted: s every two years

Deleted: , and a second one

Deleted: professors

**METHODS**

A descriptive repetitive of cross-sectional survey, Each one of the different analyses will consist of two surveys: one for all the students in the 1st, 3rd and 5th years of medical school in all the Spanish schools of medicine asking about their knowledge, perceptions and attitudes in relation to Primary Care and Family Practice. There will be an additional survey for the coordinating faculty of the study in each University about the educational activities related to Primary Care and Family Practice that are carried out in their centres. The repetition of the study every two years will allow for an analysis of the evolution of the cohort of students until they receive their degree, and the changes that take place in them during their stay in medical school.

This study will provide useful information for strategic planning decisions, content and educational methodology in the medical schools. It will also help to evaluate the impact

Deleted: , so that they may adapt their curricula to the new needs and social expectations

## Article summary

### Article focus

- There is a need to explore further the reasons for which students choose a specific specialty for training and future practice.
- This protocol outlines the design of a repetitive cross-sectional survey to evaluate attitudes and perceptions of medical students about family medicine. The project will assess the potential impact of medical school teaching on the final profiles of students, both in perceptions and expectations and in the choice of specialty.

### Key messages

- This is a protocol of a multicenter survey that will take place in Spanish medical schools. The study includes a survey for students and one for the coordinators of family medicine in each center.
- The repetition of the student survey every two years will allow for an analysis of the evolution of the student cohort until the end of their studies, as well as the changes in those that are beginning their study.
- The results of this study will provide valuable information for curriculum development related to PC in the different Schools of Medicine, and will help to prioritize those activities that will be most effective for promoting this specialty in Spain.

### Strengths and limitations of this study

- Strengths: the research team for this study includes coordinating faculty from 22 of the 27 universities throughout Spain. The repetitive nature of the survey will allow to evaluate the change in time of the different issues studied.
- Limitations: the principal limitations of this study are related to its design, which bases data collection on attitude surveys, and this introduces subjectivity. The anonymous nature of the questionnaire makes it impossible to evaluatei at an individual level the evolution over time.

**Deleted:** knowledge**Deleted:** , perceptions and expectations**Deleted:** in relation to**Formatted:** Font: 12 pt**Formatted:** Bullets and Numbering**Formatted:** Bullets and Numbering**Formatted:** Bullets and Numbering



This transformation and adaptation has not been reflected in the inclusion of the specialty, either as a course of study or area of knowledge, in the majority of medical schools in Spain<sup>3,4</sup>. This is a marked difference from what has occurred in other Western countries, in which the presence of FM and primary care (PC) has been consolidated and acknowledged for decades<sup>5,6</sup>. Despite the fact that almost 40% of the students will go on working in PC, the majority of universities do not have an assessed placement as such, and the presence of this training is limited to a few practice sessions in a health centre or a student selected component with little weight in the curricula<sup>4,7</sup>.

- Deleted: [1, 2]
- Formatted: Superscript
- Formatted: Superscript
- Deleted: [3,4]
- Formatted: Superscript
- Deleted: is going to
- Deleted: obligatory assignment
- Deleted: n optional
- Deleted: course
- Formatted: Superscript
- Deleted: that offers few credits

At the moment there is no Department of Family Medicine in Spanish medical schools, and the presence of this subject in University is scarce, to say the least<sup>8,9</sup>. This is true not only in quantitative terms but in qualitative terms as well, when one takes into account its importance and presence in health care services and Spanish society as a whole. Starting in the 1980s some Spanish schools of medicine have offered their students practice sessions in the consultation of family medicine physicians, which are complemented with seminars imparted by associate professors in the university health centres<sup>7,8</sup>. Since then, Spanish universities have slowly started to introduce FM in the curricula and at present 25 of the 27 schools of medicine have some type of teaching in FM<sup>4,9</sup>. Three universities have family and community medicine as an assessed placement, 7 offer it as an student selected component, 17 require obligatory practice sessions and 12 optional sessions. Spanish universities now have 157 university health centres, with 151 faculty in teaching and research, of which 4 are professors and 147 are associate professors, as well as 300 honorary professors. For a few years there have been two Chairs, with their corresponding directors<sup>4</sup>. In general, when looking at Spain's European neighbours, it is easy to realize that there are evident differences in the universities' medical curricula, which stress a series of characteristics of FM, such as continuous care of patients and holistic health focus, and are oriented to the individual, the family and the community.

- Deleted: [5,6]
- Deleted: consults
- Deleted: [7,8]
- Formatted: Superscript
- Formatted: Superscript
- Deleted: [9,4]
- Deleted:
- Deleted: obligatory assignment
- Deleted: optional course
- Deleted: ,
- Deleted: require optional
- Deleted: practice sessions
- Deleted: 3
- Deleted: professors
- Deleted: full
- Formatted: Superscript
- Deleted: <sup>4</sup>
- Deleted: [4]
- Deleted:

The attitudes and perceptions toward PC and FM of students in the schools of medicine in Spain are presently not well known. Two studies have been performed so far.<sup>10,11</sup> In the first one Menárguez Puche surveyed 216 medical students to assess their attitudes towards FM and its importance in undergraduate medical studies. Results showed that only 1.4% of those surveyed had FM as a first choice of specialty, whereas 48.1% were considering it as an alternative choice. On the other hand, 35.2% of the students answered that they would only choose it if they could not get into other specialties, and 15.3% said they would never choose it. The students believed that university should give an important role to FM. However they gave low importance themselves to it. Nevertheless, that low importance is in accordance with their choices for postgraduate specialization. The authors conclude that FM continues to be little known by Spanish medical students, which makes them not see it as a viable choice for postgraduate study.<sup>10</sup> Also recently, Escobar Rabadan et al. surveyed medical students at the beginning and end of a course on PC.<sup>11</sup> A total of 44 students out of the 88 surveyed answered the questionnaire. The objective of the study was to explore what socio-demographic and academic variables of medical students are associated with a better knowledge and more favourable attitude to FM, before and after finishing a course on PC. Results showed that the only variable that was associated was gender, with women, especially younger women, showing the most favourable attitudes toward FM and PC.

The international literature also has few studies on this subject, either before or after the end of undergraduate study. However, attitude has been studied in various international studies, especially by Anglo-Saxon universities.<sup>12-17</sup> In general the available information shows that the attitude of medical students toward FM improves as they progress in the school of medicine, and that it is proportionately related with the degree of contact they have with FM during their undergraduate training.<sup>17,21</sup> In a study performed in the United Kingdom, the attitude of medical students toward FM as a specialty and toward family physicians was analysed.<sup>15</sup> The students reflected a positive attitude toward both and listed their personal experience with family physicians as the most influential factor on their attitude. The attitude of the students with respect to the specialty as well as to

Deleted: knowledge

Deleted: of, and

Deleted: s

Deleted: not

Deleted: done thus

Formatted: Superscript

Deleted: [10,11]

Deleted: learn

Deleted: opinions

Deleted: about

Deleted: as

Deleted: It is interesting to note the discordance between what

Deleted: t

Deleted: to be the importance the u

Deleted: gives

Deleted: and the

Deleted: that they

Deleted: give

Formatted: Superscript

Deleted: [10].

Formatted: Superscript

Deleted: [11].

Deleted: learn

Deleted: f

Formatted: Superscript

Deleted: [12,13,14,15,16,17]

Formatted: Superscript

Deleted: [18,19,20,21,17]

Deleted: done

Formatted: Superscript

Deleted: [15]

The reasons for which students choose a specific specialty for training and future practice are complex. Different factors have shown an association with the selection of FM: the desire to practice a specialty with multiple branches, social orientation, characteristics of the medical school the student attends, characteristics such as hours and aspects related to the volume and qualities of the work (expected salary, prestige, possibility of finding work, follow-up of patients, etc.), and personal interaction<sup>16,22-24</sup>. In general, students see themselves as generalists or specialists from the moment they enter medical school. Different studies have shown that, although there is a margin for variation in the selection of the future specialty, the preferred choice at the moment of entering medical school is a key predictive factor<sup>11,25</sup>**Error! Reference source not found.** For this reason a high percentage of students end up choosing a specialty that is closely related to the one they preferred when they entered medical school.

Formatted: Superscript

Deleted: [22,23,16,24]

Deleted: <sup>11</sup>Deleted: <sup>25</sup>Deleted: <sup>(ref)</sup>

Formatted: Superscript

Formatted: Superscript, Highlight

Formatted: Superscript

Within this context and given the scarce information on this subject in Spain we have designed a repetitive, cross-sectional survey that will allow us to evaluate the potential impact of medical school teaching on the final profiles of students, both in perceptions and expectations and in the choice of specialty.

Deleted: longitudinal

Deleted: tudy

Deleted: ould

## METHODS

This is a multicenter survey that will take place in Spanish medical schools. This proposal refers to the initial observation and the first follow-up after two years. Each follow-up survey will consist of two different questionnaires: one will be given to students in different courses of the Spanish medical school undergraduate curricula, asking about their knowledge, perceptions and attitudes on PC and FM. This questionnaire will be repeated every two years. The repetition of the survey every two years will allow for an analysis of the evolution of the student cohort until the end of their studies, as well as the changes in those that are beginning their study. The other questionnaire will be given to the coordinating faculty who coordinate the study in each of the medical schools and will

Deleted: n

Deleted: observational quantitative study with follow-up, and t

Deleted: the first is a questionnaire

Deleted: ; t

Deleted: professors

### Subjects

The study subjects will be all students in the first, third and fifth year of study of Medicine and Surgery in all Spanish medical schools (approximately between 12,000 and 14,000 students). The rationale for choosing the third and fifth year is that in the third is when the students start clinical exposure, and in the fifth year they are in a more advanced situation from the clinical point of view. The first year will provide a baseline value. At the same time, a different survey will be addressed to the study's local coordinating faculty in each medical school (1 or 2 faculty per school). Participation will be voluntary.

surveys every two years will allow for an analysis of the evolution of the student cohort until the end of their studies, as well as the changes in those that are beginning their study.

**Deleted:** We will additionally put together a systematic review of the available literature on this topic.

**Deleted:** taken

**Deleted:** by

**Deleted:** professors

**Deleted:** professors

**Deleted:**

**Formatted:** French (France)

### Student questionnaire

#### Design of the questionnaire

The instrument of measure will be a specifically designed questionnaire made up of a series of items that will be evaluated on a scale similar to a Likert scale, with some open questions. A list of items will be obtained from the literature review, such as attitudes, perceptions, specialty preference, and demographic characteristics. With these items we will develop the first version of the questionnaire. A pilot study will be done with students in different years of medical school in Barcelona, Madrid, Alicante and Zaragoza in order to validate the questionnaire, evaluate its reliability, and verify that it is adequate and well accepted. The final version will be developed based on the results of the pilot study. The questionnaire will also collect information on the student characteristics that the literature review shows are related to attitudes and perceptions about PC and FM.

**Deleted:** f

**Deleted:** opinion

**Deleted:** s

#### Data collection

Data collection will take place close to the beginning of the second four-month period of the academic year. The completion of the questionnaire will be done in the classroom, in paper format, taking advantage of training sessions for the students. If needed, it will also be possible to respond via the Internet ([www.surveymonkey.com](http://www.surveymonkey.com))

**Deleted:** four month

**Deleted:** n some specific cases

**Deleted:** through the following website:

**Field Code Changed**

**Deleted:** .

In each medical school there will be one or two faculty who will be the local coordinators of the study. These coordinators will answer a specific questionnaire about educational and other activities related to PC and FM that is taking place in their local school during the present academic year.

Deleted: professors

Deleted: teaching

Deleted: y

### Data analysis

A descriptive analysis of the answers will be undertaken, both by groups and individually, for each of the study years. Proportions will be used for categorical variables and means, and standard deviations for quantitative variables. Variability according to medical school and study year will be analyzed, both via variability quotients and also by comparing the different strata with the Chi-squared test and analysis of variance.

The existence of an association between the questionnaire scores and each of its dimensions will also be analyzed. This will be done by looking at the students' individual characteristics and comparing them to teaching activity related to PC and FM in the different medical schools. This analysis will use both bivariate procedures (Chi-squared test, analysis of variance) as well as multivariate ones. A multiple linear regression will be done, with the survey scores and dimension scores as dependent variables, and the rest of the variables being considered descriptive. The selection of variables will be done step by step from an initial model formed by variables with a bivariate association with dependent variables of  $p \leq 0.20$ . The dependent variables will then be dichotomized and the analysis will be repeated through logistic regression.

Alter the second survey two years later the same analyses will take place and in addition the evolution of the questionnaire scores and activity related to PC and FM will be analyzed by comparing the results with those of the students in the same year of study (first, third and fifth), and also by comparing the evolution of results from those who were originally in the first and third years. This will be done through Chi-squared tests and analysis of variance.

1  
2  
3  
4  
5  
6  
7  
8  
9  
10  
11  
12  
13  
14  
15  
16  
17  
18  
19  
20  
21  
22  
23  
24  
25  
26  
27  
28  
29  
30  
31  
32  
33  
34  
35  
36  
37  
38  
39  
40  
41  
42  
43  
44  
45  
46  
47  
48  
49

The proposed study has been designed to evaluate the forementioned characteristics at the beginning of medical training and throughout time. Given its sample size (number of medical schools and students) and the fact that it implies a follow-up of the students, this project will provide relevant information which is presently not available in the international literature. The study takes place in the context of the changes due to the Bologna Process (<http://www.ond.vlaanderen.be/hogeronderwijs/bologna/>). The overarching aim of the Bologna Process is to create a European Higher Education Area (EHEA) based on international cooperation and academic exchange. There are changes taking place actually, due to Bolgne Process and to the general tendency in most medical schools to start introducing some more teaching activities in Family Practice. The results of this study will generate in the next few years information about the evolution of knowledge, attitude and perceptions about FM and PC as a specialty. They will also assist in analyzing the relation of different factors to perception and the final choice of FM as a specialty.

Formatted: Font: Arial, 12 pt, Not Highlight

Deleted: will provide

Deleted: when students start medical school (knowledge and attitudes)

### Study's limitations

The principal limitations of this study are related to its design, which bases data collection on attitude surveys, and this introduces subjectivity. Secondly, the percentage of replies can be generally low, and also vary according to medical school and specific items, which can introduce a bias. The role of the coordinating faculty in each medical school is essential in order to reduce the number of unanswered questionnaires. Another difficulty, since the questionnaire is anonymous, is the impossibility of evaluating at an individual level the evolution over time of the assessed characteristics and dimensions.

Deleted: opinion

Deleted: professors

### Study's strengths

The design of this study has various strengths. One of the principal ones is the completion of the questionnaire in the classroom, in paper format, during some of the

1  
2  
3  
4  
5  
6  
7  
8  
9  
10  
11  
12  
13  
14  
15  
16  
17  
18  
19  
20  
21  
22  
23  
24  
25  
26  
27  
28  
29  
30  
31  
32  
33  
34  
35  
36  
37  
38  
39  
40  
41  
42  
43  
44  
45  
46  
47  
48  
49

students not responding. In specific cases, when local circumstances make difficult to get the students together, it will also be possible to respond via the Internet. The research team for this study includes coordinating faculty from 22 of the 27 universities throughout Spain, which should bring the total number of surveyed individuals to over 10,000, making this the largest study on this subject internationally. This sample size and the expected high response rate will make the study be a representative assessment of the present situation in Spain.

BMJ Open

Deleted: Also, i  
Deleted: , which will increase the response rate  
Deleted: work  
Deleted: profess  
Deleted: ionals

**Implications**

This national survey will provide information on the attitudes and perceptions students in Medical Schools have of primary care and the role of family practice, in the health system. It will also allow us to assess their attitude on its usefulness, and the need for specific training in PC and FM at the undergraduate level. For these reasons we believe that the results of this study will provide valuable information for curriculum development related to PC in the different Schools of Medicine, and will help to prioritize those activities that will be most effective for promoting this specialty in Spain.

Deleted: degree of knowledge that medical students in Spain have about PC, and their  
Deleted: of its role and that of FM  
Deleted: opinion



1. Barber Pérez P, González López-Valcárcel B: **Oferta y necesidad de especialistas médicos en España (2008-2025)**. Ministerio de Sanidad y Consumo; Marzo 2009.
2. Martín Zurro A, Cano Pérez JF: **Docencia en Atención Primaria y medicina de familia. En Atención Primaria. Conceptos, organización y práctica clínica**. Martín Zurro A y Cano Pérez JF (eds). Elsevier España. 5ª edición. Madrid ; 2003.
3. Menárguez Puche JF, Tudela deGea MB, Hernández Sánchez JM, García-Estañ J: **Medicina de familia y Universidad, ¿cómo lo ven los estudiantes?. Aten Primaria** 2010;**42**:303-4.
4. Bonal Pitz P, Casado Vicente V: **La medicina de familia como disciplina académica y la atención primaria como entorno de aprendizaje. Aten Primaria** 2004;**34**:433-6.
5. [Graham R, Roberts RG, Ostergaard DJ, Kahn NB, Pugno PA, Green LA. Family Practice in the United States. A status report. JAMA 2002;288:1097-101.](#)
6. [Geyman JP, Bliss E. What does family practice need to do next? A cross-generational view. Fam Med 2001;33:259-67.](#)
7. [Sistema Nacional de Salud 2010. Anexo D. Datos y cifras. Ministerio de Sanidad y Política Social. Madrid: 2010:58-61](#)
8. Menarguez Puche JF, Gomez-Calcerrada Berrocal D, Gonzalez Diaz M, Saura Llamas J: **Undergraduate teaching of primary health care. A Delphi study. Aten Primaria** 1992;**10**:876-9.
9. Zarco Montejo J: **Situación de la medicina de familia en la universidad española y europea. Revista de la Sociedad Madrileña de Medicina de Familia y Comunitaria** 2005;**7**:8-16.
7. De Lorenzo-Cáceres A, Otero A, Calvo E, Engel JL: **Contacto precoz del alumno con el paciente en atención primaria. Una experiencia de aprendizaje basada en la resolución de problemas. Educación Médica** 1998;**1**:24-31

Deleted: ,

Deleted: (8)

Formatted: Font: Arial, Spanish (Spain-Modern Sort)

Formatted: Indent: Left: 0 pt, Hanging: 14.2 pt, Line spacing: 1.5 lines, Numbered + Level: 1 + Numbering Style: 1, 2, 3, ... + Start at: 1 + Alignment: Left + Aligned at: 0 pt + Tab after: 0 pt + Indent at: 18 pt, Adjust space between Latin and Asian text, Adjust space between Asian text and numbers

Formatted: Font: Arial, Bold, Spanish (Spain-Modern Sort)

Formatted: Font: Arial, Spanish (Spain-Modern Sort)

Formatted ... [1]

Formatted ... [2]

Formatted ... [3]

Formatted ... [4]

Formatted ... [5]

Formatted ... [6]

Formatted: Font: Arial

Formatted ... [7]

Formatted: Font: Arial

Formatted ... [8]

Formatted ... [9]

Formatted ... [10]

Formatted ... [11]

Formatted: Font: Arial, Italic

Formatted ... [12]

Formatted ... [13]

Formatted ... [14]

Formatted: Font: Arial, 12 pt, Bold

Formatted ... [15]

Formatted: Bullets and Numbering

Formatted: Bullets and Numbering

Formatted: English (U.K.)

Deleted: ,

Deleted: (7)

Formatted: English (U.K.)

Deleted: ,

Deleted: (2)

Deleted: ,



- 1  
2  
3  
4  
5  
6  
7  
8  
9  
10  
11  
12  
13  
14  
15  
16  
17  
18  
19  
20  
21  
22  
23  
24  
25  
26  
27  
28  
29  
30  
31  
32  
33  
34  
35  
36  
37  
38  
39  
40  
41  
42  
43  
44  
45  
46  
47  
48  
49
- Aten Primaria 2005;**35**:372-4
9. Gil VF, Quirce F, Orozco D, Uris J, Simon-Talero M, Merino J. **Opinion of university professors on the suitability of specific primary care training in medical students.** *Aten Primaria* 1995;**15**:179-82.
10. Menárguez Puche JF, Tudela de Gea MB, Hernández Sánchez JM, García-Estañ López J. **Medicina de Familia y universidad, ¿Cómo lo ven los estudiantes?** *Aten Primaria* 2009. [Epub ahead of print]
11. Escobar Rabadán F, López-Torres Hidalgo J. **¿Qué características de los estudiantes de medicina se relacionan con mejores conocimientos y actitudes hacia la medicina de familia?** *Aten Primaria* 2009; **41**:431-6.
12. Garrett EA, Dietrich AJ. **Students' evolving attitudes toward family medicine and specialty choices at one medical school.** *Acad Med* 1991;**66**:625-7.
13. Grayson MS, Newton DA, Whitley TW. **First-year medical students' knowledge of and attitudes toward primary care careers.** *Fam Med* 1996;**28**:337-42.
14. Lynch DC, Newton DA, Grayson MS, Whitley TW. **Influence of medical school on medical students' opinions about primary care practice.** *Acad Med* 1998;**73**:433-5.
15. Henderson E, Berlin A, Fuller J. **Attitude of medical students towards general practice and general practitioners.** *Br J Gen Pract* 2002;**52**:359-63.
16. Wright B, Ian Scott, Wayne Woloschuk, Fraser Brenneis. **Career choice of new medical students at three Canadian universities: family medicine versus specialty medicine.** *CMAJ* 2004;**170**:1920-4
17. Miettola J, Mantyselka P, Vaskilampi T. **Doctor-patient interaction in Finnish primary health care as perceived by first year medical students.** *BMC Med Educ* 2005;**5**:34.
18. Ochoa-Díaz Lopez H. **Medical curricula and students' attitudes towards general and family practice in Mexico.** *Med Educ* 1987;**21**:189-98.

Deleted: (7)

Deleted: (3)

Deleted: (8)

Deleted: (10)

Deleted: (5)

Deleted: (4)

Deleted: (478)

Deleted: (13)

Deleted: (1)

Deleted: (3)

new four-week attachment in general practice. *Br J Gen Pract* 1996;**46**:721-5

20. Kalantan K, Pyrne N, Al-Faris E, Al-Taweel A, Al-Rowais N, Abdul Ghani H, Eldin Magzoub M. **Students' perceptions towards a family medicine attachment experience.** *Educ Health (Abingdon)* 2003;**16**:357-65.

21. Williamson M, Gormley A, Bills J, Farry P. **The new rural health curriculum at Dunedin School of Medicine: how has it influenced the attitudes of medical students to a career in rural general practice?** *N Z Med J* 2003;**116**:U537.

22. Mann MP. **Attitudes toward and subsequent career choice of family practice: a weak relationship.** *Fam Med* 1994;**26**:504-8.

23. Senf JH, Campos-Outcalt D, Kutob R. **Factors related to the choice of family medicine: a reassessment and literature review.** *J Am Board Fam Pract* 2003 Nov-Dec;**16**:502-12.

24. Tolhurst H, Stewart M. **Becoming a GP--a qualitative study of the career interests of medical students.** *Aust Fam Physician* 2005;**34**:204-6.

25. Henderson E, Berlin A, Fuller J. **Attitude of medical students towards general practice and general practitioners.** *Br J Gen Pract* 2002;**52**:359-63

Deleted: (413)

Deleted: (3)

Deleted: (1179)

Deleted: (8)

Deleted: (6)

Deleted: (3)

Formatted: Spanish (Spain-Modern Sort)

Formatted: Font: Arial, 12 pt

Formatted: Justified, Space After: 0 pt, Line spacing: 1.5 lines

Formatted: Bullets and Numbering

Formatted: Font: Arial, 12 pt, Bold

Formatted: Font: Arial, 12 pt

Formatted: Font: Italic

Formatted: Font: Arial, 12 pt, Bold, English (U.K.)

Formatted: English (U.K.)

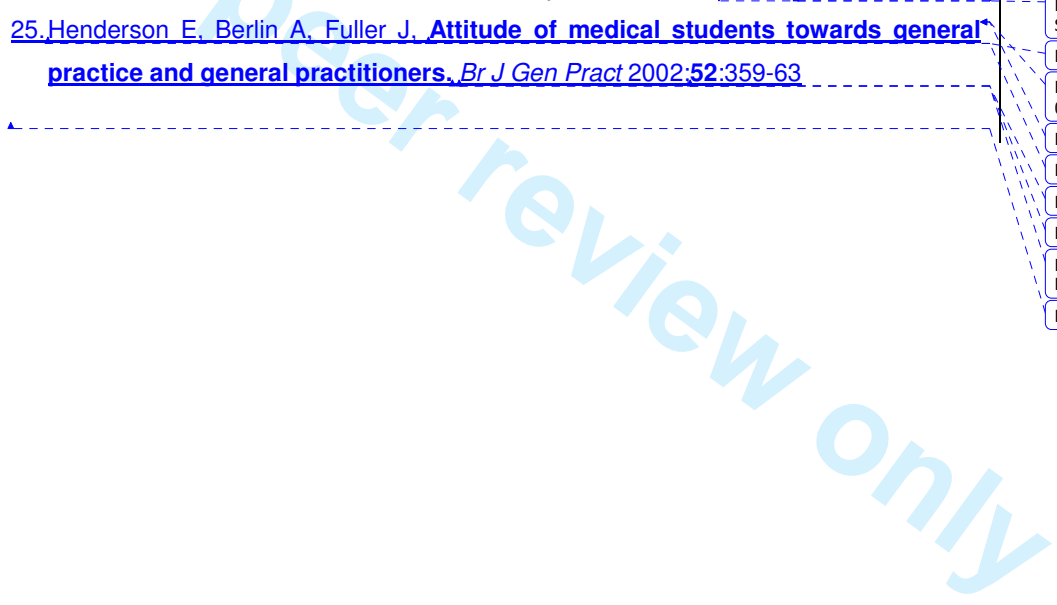

1  
2  
3  
4  
5  
6  
7  
8  
9  
10  
11  
12  
13  
14  
15  
16  
17  
18  
19  
20  
21  
22  
23  
24  
25  
26  
27  
28  
29  
30  
31  
32  
33  
34  
35  
36  
37  
38  
39  
40  
41  
42  
43  
44  
45  
46  
47  
48  
49

|                                  |          |
|----------------------------------|----------|
| <b>General objectives:</b>       | ... [16] |
| <b>Formatted:</b> English (U.K.) |          |

1  
2  
3  
4  
5  
6  
7  
8  
9  
10  
11  
12  
13  
14  
15  
16  
17  
18  
19  
20  
21  
22  
23  
24  
25  
26  
27  
28  
29  
30  
31  
32  
33  
34  
35  
36  
37  
38  
39  
40  
41  
42  
43  
44  
45  
46  
47  
48  
49

For peer review only

Figure legends

Figure 1. Study design flowchart

Abbreviations and definitions

PC: primary care, FM: family medicine

Primary care: initial point of consultation for patients in a national health care organisation. The professionals involved usually include family physicians, nurses and pediatricians. Sometimes some primary care centres include other specialist like midwives, gynaecologist, cardiologist, endocrinologist or others.

Family medicine: Family medicine is normally the point of first medical contact within the health care system, providing open and unlimited access to its users, dealing with all health problems regardless of the age, sex, or any other characteristic of the person concerned (Wonca Europe. The European Definition of General Practice/Family Medicine. 2002).

Competing interests

The authors declare that they have no competing interests.

Authors' contributions

AMZ, JJV and PAC participated in the conception and design of the protocol and drafted a first version. All authors participated, revising it critically for important intellectual content and have given final approval of the version to be published.

Formatted: Font: (Default) Arial, 12 pt, Not Bold, Not Italic, English (U.S.)

Formatted: Body Text 2, Line spacing: 1.5 lines, Adjust space between Latin and Asian text, Adjust space between Asian text and numbers

**Deleted:** Primary care: Primary care is the term for the health services by providers who act as the principal point of consultation for patients within a health care system.[1][2] Such a professional can be a primary care physician, such as a general practitioner or family physician, or depending on the locality, health system organization, and patient's discretion, they may see a pharmacist, a nurse practitioner, a nurse (such as in the United Kingdom), a clinical officer (such as in parts of Africa), or an Ayurvedic or other traditional medicine professional (such as in parts of Asia).¶ Family medicine: Family medicine (FM) is a medical specialty devoted to comprehensive health care for people of all ages. It is a division of primary care that provides continuing and comprehensive health care for the individual and family across all ages, sexes, diseases, and parts of the body.[1] It is based on knowledge of the patient in the context of the family and the community, emphasizing disease prevention and health[... [17]

Formatted: Font: (Default) Arial, Not Bold, English (U.S.)

Formatted: Font: (Default) Arial, English (U.S.)

Formatted: Font: (Default) Arial, English (U.S.), Not Superscript/ Subscript

Formatted: Font: (Default) Arial, English (U.S.)

Formatted: Font: (Default) Arial, Not Bold, English (U.S.)

Formatted: Font: (Default) Arial, English (U.S.)

Formatted: Font: (Default) Arial, Not Bold, English (U.S.)

Formatted: Font: (Default) Arial, English (U.S.)

Formatted: Font: (Default) Arial, English (U.S.), Not Superscript/ Subscript

Formatted: Font: (Default) Arial, English (U.S.)

**Sources of funding**

This project is funded with a grant from the Instituto de Salud Carlos III, Ministerio de Sanidad, Spain (PI070975). PAC is funded by a Miguel Servet contract by the Instituto de Salud Carlos III (CP09/00137).

For peer review only

1  
2  
3  
4  
5  
6  
7  
8  
9  
10  
11  
12  
13  
14  
15  
16  
17  
18  
19  
20  
21  
22  
23  
24  
25  
26  
27  
28  
29  
30  
31  
32  
33  
34  
35  
36  
37  
38  
39  
40  
41  
42  
43  
44  
45  
46  
47  
48  
49

|                                                                                                                                                                                   |                |                              |
|-----------------------------------------------------------------------------------------------------------------------------------------------------------------------------------|----------------|------------------------------|
| <b>Page 11: [1] Formatted</b>                                                                                                                                                     | <b>PAlonso</b> | <b>8/11/2011 1:52:00 PM</b>  |
| Font: Arial, Italic, Spanish (Spain-Modern Sort)                                                                                                                                  |                |                              |
| <b>Page 11: [2] Formatted</b>                                                                                                                                                     | <b>PAlonso</b> | <b>8/11/2011 1:54:00 PM</b>  |
| Font: Arial, Spanish (Spain-Modern Sort)                                                                                                                                          |                |                              |
| <b>Page 11: [3] Formatted</b>                                                                                                                                                     | <b>PAlonso</b> | <b>8/11/2011 1:51:00 PM</b>  |
| Font: Arial, Bold, Spanish (Spain-Modern Sort)                                                                                                                                    |                |                              |
| <b>Page 11: [4] Formatted</b>                                                                                                                                                     | <b>PAlonso</b> | <b>8/11/2011 12:47:00 PM</b> |
| Font: Arial, Spanish (Spain-Modern Sort)                                                                                                                                          |                |                              |
| <b>Page 11: [5] Formatted</b>                                                                                                                                                     | <b>PAlonso</b> | <b>8/11/2011 12:47:00 PM</b> |
| Font: Arial, 12 pt, Spanish (Spain-Modern Sort)                                                                                                                                   |                |                              |
| <b>Page 11: [6] Formatted</b>                                                                                                                                                     | <b>PAlonso</b> | <b>8/11/2011 12:47:00 PM</b> |
| Line spacing: 1.5 lines, Adjust space between Latin and Asian text, Adjust space between Asian text and numbers                                                                   |                |                              |
| <b>Page 11: [7] Formatted</b>                                                                                                                                                     | <b>PAlonso</b> | <b>8/11/2011 12:47:00 PM</b> |
| Font: Arial, Spanish (Spain-Modern Sort)                                                                                                                                          |                |                              |
| <b>Page 11: [8] Formatted</b>                                                                                                                                                     | <b>PAlonso</b> | <b>8/11/2011 12:47:00 PM</b> |
| Font: Arial, Spanish (Spain-Modern Sort)                                                                                                                                          |                |                              |
| <b>Page 11: [9] Formatted</b>                                                                                                                                                     | <b>PAlonso</b> | <b>8/11/2011 1:51:00 PM</b>  |
| Font: Arial, Bold, Spanish (Spain-Modern Sort)                                                                                                                                    |                |                              |
| <b>Page 11: [10] Formatted</b>                                                                                                                                                    | <b>PAlonso</b> | <b>8/11/2011 12:47:00 PM</b> |
| Indent: Left: 0 pt, Hanging: 14.2 pt, Numbered + Level: 1 + Numbering Style: 1, 2, 3, ... + Start at: 1 + Alignment: Left + Aligned at: 0 pt + Tab after: 0 pt + Indent at: 18 pt |                |                              |
| <b>Page 11: [11] Formatted</b>                                                                                                                                                    | <b>PAlonso</b> | <b>8/11/2011 12:47:00 PM</b> |
| Font: Arial, Spanish (Spain-Modern Sort)                                                                                                                                          |                |                              |
| <b>Page 11: [12] Formatted</b>                                                                                                                                                    | <b>PAlonso</b> | <b>8/11/2011 12:47:00 PM</b> |
| Font: Arial, Spanish (Spain-Modern Sort)                                                                                                                                          |                |                              |
| <b>Page 11: [13] Formatted</b>                                                                                                                                                    | <b>PAlonso</b> | <b>8/11/2011 1:51:00 PM</b>  |
| Font: Arial, Bold, Spanish (Spain-Modern Sort)                                                                                                                                    |                |                              |
| <b>Page 11: [14] Formatted</b>                                                                                                                                                    | <b>PAlonso</b> | <b>8/11/2011 12:47:00 PM</b> |
| Font: Arial, Spanish (Spain-Modern Sort)                                                                                                                                          |                |                              |
| <b>Page 11: [15] Formatted</b>                                                                                                                                                    | <b>PAlonso</b> | <b>8/11/2011 1:19:00 PM</b>  |
| Justified, Indent: Left: 0 pt, Hanging: 14.2 pt, Line spacing: 1.5 lines, Adjust space between Latin and Asian text, Adjust space between Asian text and numbers                  |                |                              |
| <b>Page 14: [16] Deleted</b>                                                                                                                                                      | <b>Unknown</b> |                              |

### **Table 1. Objectives**

#### ***General objectives:***

To assess learn the degree of information of medical students in Spain about Primary Care, and their perception of its role and that of Family Medicine within the health system.

To learn assess the opinion perceptions of medical students in Spain on the usefulness and need for specific training in Primary Care and Family Medicine at the undergraduate level.

To follow the changes and determine the evolution throughout time of the degree of information and opinion attitudes of medical students in Spain on towards Primary Care and their perception of its role and that of Family Medicine within the health system.

***Specific objectives:***

In relation to the degree of information that Spanish medical students have about Primary Care and their perception of its role and that of Family Medicine within the health system, and their opinion perception on the usefulness and need for specific training in Primary Care and Family Medicine at the undergraduate level:

To determine the degree of variability in relation to the year of study the student is in

To determine the degree of variability in relation to the curricular experience medical school of each Medical School

To determine what student characteristics are associated with information, perception and opinion attitudes

To evaluate if information, perception and opinion attitudes are related to training activity in Primary Care during the period of study

To learn collect exactly what teaching activity, both theoretical and practical and related to Primary Care is offered in Spanish schools of medicine

To describe the expectations for professional practice of medical students in relation to Primary Care and Family Medicine and their variability, according to year of study and medical school

To determine the characteristics associated with the choice of Family Medicine as a specialty

To evaluate the viability of electronic surveys

Page 15: [17] Deleted

PAlonso

8/11/2011 1:44:00 PM

Primary care: Primary care is the term for the health services by providers who act as the principal point of consultation for patients within a health care system.[1][2] Such a professional can be a primary care physician, such as a general practitioner or family physician, or depending on the locality, health system organization, and patient's discretion, they may see a pharmacist, a nurse practitioner, a nurse (such as in the United Kingdom), a clinical officer (such as in parts of Africa), or an Ayurvedic or other traditional medicine professional (such as in parts of Asia).

Family medicine: Family medicine (FM) is a medical specialty devoted to comprehensive health care for people of all ages. It is a division of primary care that provides continuing and comprehensive health care for the individual and family across all ages, sexes, diseases, and parts of the body.[1] It is based on knowledge of the patient in the context of the family and the community, emphasizing disease prevention and health promotion





**Attitudes and perceptions of medical students about primary care and family practice in Spain: Protocol for a cross-sectional survey**

|                                 |                                                                                                                                                                                                                                                                                                                                                                                                                                                                                                                                                                                                                                                                                                                                      |
|---------------------------------|--------------------------------------------------------------------------------------------------------------------------------------------------------------------------------------------------------------------------------------------------------------------------------------------------------------------------------------------------------------------------------------------------------------------------------------------------------------------------------------------------------------------------------------------------------------------------------------------------------------------------------------------------------------------------------------------------------------------------------------|
| Journal:                        | <i>BMJ Open</i>                                                                                                                                                                                                                                                                                                                                                                                                                                                                                                                                                                                                                                                                                                                      |
| Manuscript ID:                  | bmjopen-2011-000231.R2                                                                                                                                                                                                                                                                                                                                                                                                                                                                                                                                                                                                                                                                                                               |
| Article Type:                   | Protocol                                                                                                                                                                                                                                                                                                                                                                                                                                                                                                                                                                                                                                                                                                                             |
| Date Submitted by the Author:   | 22-Sep-2011                                                                                                                                                                                                                                                                                                                                                                                                                                                                                                                                                                                                                                                                                                                          |
| Complete List of Authors:       | Martín-Zurro, Amando; Servicio Catalán de la Salud, División de Planificación y Evaluación Operativa<br>Jiménez Villa, Josep; Servicio Catalán de la Salud, División de Planificación y Evaluación Operativa<br>Monreal Hajar, Antonio; Catedra UNIZAR-Novartis de Docencia e Investigación en Medicina de Familia y Atención Primaria, Universidad de Zaragoza<br>Mundet Tuduri, Xavier; Catedra UAB-Novartis de Docencia e Investigación en Medicina de Familia, Universitat Autònoma de Barcelona<br>Otero Puime, Ángel; Cátedra UAM-Novartis de doencia e Investigación en Medicina de Familia y Atención Primaria, Universidad Autónoma de Madrid<br>Alonso-Coello, Pablo; Iberoamerican Cochrane Centre, CIBERESP-IIB Sant Pau |
| <b>Primary Subject Heading</b>: | General practice & Family practice                                                                                                                                                                                                                                                                                                                                                                                                                                                                                                                                                                                                                                                                                                   |
| Keywords:                       | EDUCATION & TRAINING (see Medical Education & Training), EPIDEMIOLOGY, PRIMARY CARE                                                                                                                                                                                                                                                                                                                                                                                                                                                                                                                                                                                                                                                  |
|                                 |                                                                                                                                                                                                                                                                                                                                                                                                                                                                                                                                                                                                                                                                                                                                      |

SCHOLARONE™  
Manuscripts

1  
2  
3  
4  
5  
6  
7  
8  
9  
10  
11  
12  
13  
14  
15  
16  
17  
18  
19  
20  
21  
22  
23  
24  
25  
26  
27  
28  
29  
30  
31  
32  
33  
34  
35  
36  
37  
38  
39  
40  
41  
42  
43  
44  
45  
46  
47  
48  
49  
50  
51  
52  
53  
54  
55  
56  
57  
58  
59  
60

**Research Checklist**

We followed the “Good practice in the conduct and reporting of survey research” guidance to prepare this protocol.

For peer review only

Alonso-Coello P<sup>1</sup>, Josep Jiménez Villa<sup>2,3,4</sup>, Antonio Monreal Hajar<sup>5</sup>, Xavier Mundet Tuduri<sup>4</sup>, Ángel Otero Puime<sup>6</sup>, Amando Martín Zurro<sup>2,3</sup>, for the University and Family Medicine Research Group (UNIMEDFAM).

1. [Iberoamerican Cochrane Centre, CIBERESP-IIB Sant Pau, Barcelona, Spain.](#)
2. Servicio Catalán de la Salud, División de Planificación y Evaluación Operativa
3. Institut Universitari d'Investigació en Atenció Primària Jordi Gol (IDIAP Jordi Gol), Gran Via 587 àtic, Barcelona, Spain
4. Càtedra UAB-Novartis de Docència e Investigació en Medicina de Família, Universitat Autònoma de Barcelona, Barcelona, Spain
5. Càtedra UNIZAR-Novartis de Docència e Investigació en Medicina de Família y Atención Primaria, Universidad de Zaragoza, Zaragoza, Spain
6. Càtedra UAM-Novartis de Docència e Investigació en Medicina de Família y Atención Primaria, Universidad Autónoma de Madrid, Spain

- a.martinzurro@gencat.cat
- jojimenez@catsalut.cat
- 16274xmt@comb.cat
- angel.otero@uam.es
- amonreal@salud.aragon.es
- palonso@santpau.cat

#### [University and Family Medicine Research Group \(UNIMEDFAM\)](#)

Amando Martín Zurro, Josep Jiménez Villa, Antonio Monreal Hajar, Xavier Mundet Tuduri, Ángel Otero Puime, Pablo Alonso-Coello, Cristina Aguado Taberné, Pablo Bonal Pitz, Francisco Buitrago Ramírez, Concepción Carratalá Munera, Verónica Casado, Vicente, María Teresa Delgado Marroquin, Ramón Descarrega Queralt, Manuel Gálvez Ibáñez, Antonio J. García Ruiz, Luís García Olmos, Vicente Francisco Gil Guillén, José Manuel Iglesias Sanmartin, Carmelo Jiménez Mena, Emilio Lara Valdivieso, Inés Lizaga Castillón, Antonio de Lorenzo-Cáceres Ascanio, Jorge Martínez de la Iglesia, Flora Martínez Pecino, Juan Francisco Menárguez Puche, M. Pilar Navarrete Durán, Jorge Navarro Pérez, Domingo Orozco Beltran, Eduard Peñascal Pujol, José Ramón Rodríguez Borges, Pilar Rodríguez Ledo, Juan Alfonso Romero Furones, Mercedes Sánchez Martínez, Juana Agustina Santana Caballero, Orlando Segura Álamo, Antonio Solbes Caro, José Zarco Montejo.

**Corresponding author:** Amando Martin Zurro Institut Universitari d'Investigació en Atenció Primària Jordi Gol (IDIAP Jordi Gol), Gran Via 587 àtic. 08007 Barcelona, Spain; a.martinzurro@gencat.cat

Deleted: Amando Martín Zurro<sup>1,2</sup>,Deleted: <sup>1</sup>,Deleted: Hajar<sup>4</sup>Deleted: Tuduri<sup>3</sup>Deleted: Puime<sup>5</sup>

Formatted: Superscript

Deleted: Alonso-Coello P<sup>6</sup>,

Deleted: dad y Medicina de Familia

Deleted: (UNIMEDFAM)

Deleted: research

Deleted: group

Deleted: 2

Formatted: Bullets and Numbering

Deleted: &lt;#&gt;Iberoamerican Cochrane Centre, CIBERESP-IIB Sant Pau, Barcelona, Spain.¶

Formatted: English (U.K.)

Formatted: Font: Bold, English (U.K.)

Deleted: UNIVERSIDAD Y MEDICINA DE FAMILIA (UNIMEDFAM) research group:¶

1  
2  
3  
4  
5  
6  
7  
8  
9  
10  
11  
12  
13  
14  
15  
16  
17  
18  
19  
20  
21  
22  
23  
24  
25  
26  
27  
28  
29  
30  
31  
32  
33  
34  
35  
36  
37  
38  
39  
40  
41  
42  
43  
44  
45  
46  
47  
48  
49

Despite the fact that family medicine has become established as a specialty in the past 25 years, this has not been reflected in the inclusion of the specialty in the majority of Medical Schools in Spain. Almost 40% of the students will work in Primary Care but, in spite of this, most universities don't have an assessed placement as such. There are only specific practice periods in health centres or some student selected components with little weight in the overall curricula.

Deleted: m  
Deleted: schools

**OBJECTIVES**

To evaluate the attitudes and perceptions of medical students about Family Medicine in the health system and their perception, about the need for specific training in Family Medicine at the undergraduate level. To explore change over time of these attitudes and perceptions, and to examine potential predictive factors for change. Finally, we will review what teaching activity in Family Medicine is offered across the Spanish Schools of medicine.

Deleted: Primary Care and about the role of  
Deleted: Practice  
Deleted: . . . To assess the  
Deleted: of medical students  
Deleted: in  
Deleted: A  
Deleted: d  
Deleted: repetitive of  
Deleted: medical  
Deleted: school  
Deleted: Practice  
Deleted: Primary Care and  
Deleted: Practice  
Deleted: , and the changes that take place in them during their stay in medical school  
Deleted: will  
Deleted: mightaims  
Deleted: the  
Deleted: m  
Deleted: schools  
Deleted: mpact  
Deleted: these potential  
Deleted: the  
Deleted: Practice  
Deleted: increased role in Medical Schools, taking place  
Deleted: , nationally

**METHODS**

Descriptive cross-sectional survey. Each one of the different analyses will consist of two surveys: one for all the students in the 1st, 3rd and 5th years of Medical School in all the Spanish schools of medicine asking about their knowledge, perceptions and attitudes in relation to Primary Care and Family Medicine. There will be an additional survey for the coordinating faculty of the study in each University about the educational activities related to Family Medicine that are carried out in their centres. The repetition of the study every two years will allow for an analysis of the evolution of the cohort of students until they receive their degree and the potential predictive factors.

This study will to provide useful information for strategic planning decisions, content and educational methodology in Medical Schools in Spain and elsewhere. It will also help to evaluate the influence of the ongoing changes in Family Medicine, locally, and at the

Article summary

Article focus

- There is a need to explore further the reasons for which students choose a specific specialty for training and future practice. This protocol outlines the design of a cross-sectional survey to evaluate attitudes and perceptions of medical students about Family Medicine.
- The project will assess the potential impact of Medical School teaching on the final profiles of students, both in perceptions and expectations and in the choice of specialty.

Key messages

- This is a protocol of a multicenter survey that will take place in Spanish Medical Schools. The study includes a survey for students and one for the coordinators of Family Medicine in each centre.
- The repetition of the student survey every two years will allow for an analysis of the evolution of student cohorts until the end of their studies.
- The results of this study will provide valuable information for curriculum development related to Family Medicine in the different Schools of Medicine, and will help to prioritize those activities that are likely to be most effective for promoting this specialty.

Strengths and limitations of this study

- Strengths: the research team for this study includes coordinating faculty from 22 of the 27 universities throughout Spain. The study will be repeated every two years and will explore change over time of the issues addressed.
- Limitations: the principal limitations of this study are related to its design, of observational nature. The results observed will serve as hypotheses generating and cannot be regarded as definitive. Finally, the fact that the survey will be anonymous will impede the evaluation, at an individual level, of change over time.

Deleted: f

Deleted: m

Deleted: This protocol outlines the design of a repetitive cross-sectional survey to evaluate attitudes and perceptions of medical students about family medicine.

Deleted: medical

Deleted: s

Deleted: medical

Deleted: schools

Deleted: family

Deleted: medicine

Deleted: center

Deleted: the

Deleted: , as well as the changes in those that are beginning their study

Deleted: PC

Deleted: primary care

Deleted: Practice

Deleted: will

Deleted: in Spain

Deleted: The repetitive nature of the survey will allow to evaluate the change in over time of the different issues studied.

Formatted: Bullets and Numbering

Deleted: which bases data collection on attitude surveys, and this introduces subjectivity.

Deleted: Tthe

Deleted: nature of the questionnaire makes it impossible to evaluate

Deleted: the evolution over time

1  
2  
3  
4  
5  
6  
7  
8  
9  
10  
11  
12  
13  
14  
15  
16  
17  
18  
19  
20  
21  
22  
23  
24  
25  
26  
27  
28  
29  
30  
31  
32  
33  
34  
35  
36  
37  
38  
39  
40  
41  
42  
43  
44  
45  
46  
47  
48  
49

For peer review only

Family medicine (FM) has become consolidated as a specialty in the past 25 years<sup>1,2</sup>. This transformation and adaptation has not been reflected in the inclusion of the specialty, either as a course of study or area of knowledge, in the majority of Medical Schools in Spain<sup>3,4</sup>. This is a marked difference from what has occurred in other Western countries, in which the presence of Family Medicine has been consolidated and acknowledged for decades<sup>5,6</sup>. Despite the fact that almost 40% of the students will go on working in Family Medicine, the majority of universities do not have an assessed placement as such, and the presence of this training is limited to a few practice sessions in a health centre or a student selected component with little weight in the curricula<sup>4,7</sup>.

At the moment there is no Department of Family Medicine in Spanish Medical Schools, and the presence of this subject in University is scarce, to say the least<sup>8,9</sup>. This is true not only in quantitative terms but in qualitative terms as well; when one takes into account its importance and presence in health care services and Spanish society as a whole. Starting in the 1980s some Spanish schools of medicine have offered their students practice sessions in the consultation of family medicine physicians, which are complemented with seminars imparted by associate professors<sup>7,8</sup>. Since then, Spanish universities have slowly started to introduce Family Medicine in the curricula and at present 25 of the 27 schools of medicine have some type of teaching in Family Medicine<sup>4,9</sup>. Three universities have Family and Community medicine as an assessed placement, 7 offer it as a student selected component, 17 require obligatory practice sessions, and 12 optional sessions. Spanish universities now have 157 university health care centres, with 151 faculty teaching and research positions, of which 4 are professors and 147 are associate professors, as well as 300 honorary professors. During the last few years there have been two Chairs, with their corresponding directors<sup>4</sup>. In general, when looking at Spain's European neighbours, it is easy to realize that there are evident differences in the universities' medical curricula, with these Schools emphasizing more a series of characteristics of FM, such as continuous care of patients and holistic health focus, and are oriented to the individual, the family and the community.

Deleted: (FM)

Deleted: m

Deleted: s

Deleted: FM and primary care

Deleted: P

Deleted: ractice

Deleted: (PC)

Deleted: Primary Care

Deleted: C

Deleted: f

Deleted: m

Deleted: s

Deleted: in the university health centres

Deleted: FM

Deleted: family

Deleted: community

Deleted: positions in

Deleted: For a

Deleted: which stress

in Spain are presently not well known. Two studies have been performed so far<sup>10,11</sup>. Menárguez Puche surveyed 216 medical students to assess their attitudes towards FM and its importance in undergraduate medical studies<sup>10</sup>. Results showed that only 1.4% of those surveyed considered FM as their first choice of specialty, whereas 48.1% were considering it as an alternative choice. On the other hand, 35.2% of the students answered that they would only choose it if they could not get into other specialties and 15.3% said they would never choose it. Students believed that FM should have an important role in university. However, they did not prioritize it themselves. This is consistent with their choices for postgraduate specialization. The authors concluded that FM continues to be not well known amongst Spanish medical students, difficulting that this specialty becomes a viable choice for postgraduate study<sup>10</sup>. Recently, Escobar Rabadan et al. surveyed 88 medical students at the beginning and end of a course on Primary Care<sup>11</sup>. The objective of the study was to explore what socio-demographic and academic variables are associated with a better knowledge and more favourable attitude to FM. Results showed that the only variable that was associated was gender, with women, especially younger women, showing the most favourable attitudes towards Family Medicine.

The international literature also has few studies on this subject, either before or after the end of undergraduate study. However, attitude has been studied in various international studies, especially by Anglo-Saxon universities<sup>12-23</sup>. In general the available information shows that the attitude of medical students toward FM improves as they progress in the school of medicine, and that it is proportionately related with the degree of contact they have with Family Medicine during their undergraduate training<sup>17,21</sup>. In a study performed in the United Kingdom, the attitude of medical students towards Family Practice as a specialty and toward family physicians was analysed<sup>15</sup>. The students reflected a positive attitude toward both and listed their personal experience with family physicians as the most influential factor on their attitude. The attitudes of the students with respect to the specialty as well as to family physicians improved during their course of study, with FM being the only specialty to show an improvement.

- Deleted: in the schools of medicine
- Deleted: In the first one
- Deleted: had
- Deleted: a
- Deleted: The
- Deleted: st
- Deleted: should give an important role to FM
- Deleted: gave low importance
- Deleted: to it
- Deleted: Nevertheless, that
- Deleted: low importance is in accordance with
- Deleted: little
- Deleted: by
- Deleted: which makes them not see it as
- Deleted: Also r
- Deleted: PC<sup>11</sup>
- Deleted: A total of 44 students out of the 88 surveyed answered the questionnaire.
- Deleted: , before and after finishing a course on PCPrimary Care.
- Deleted: Practice and Primary Care
- Deleted: M and PC
- Deleted: .
- Field Code Changed
- Deleted: <sup>17</sup>
- Deleted: FM
- Deleted: Practice
- Deleted: FM
- Deleted: during the course of study.



The reasons for which students choose a specific specialty for training and future practice are complex. Different factors have shown an association with the selection of Family Medicine: the desire to practice a specialty with multiple branches, social orientation, characteristics of the Medical School, characteristics such as hours and aspects related to the volume and quality of the work (expected salary, prestige, possibility of finding work, follow-up of patients, etc.), and personal interaction<sup>16,24,25</sup>. In general, students see themselves as family doctors, or hospital specialists from the moment they enter Medical School. Different studies have shown that, although there is a margin for variation in the selection of the future specialty, the preferred choice at the moment of entering Medical School is a key predictive factor<sup>11,26</sup>.

Within this context, and given the scarcity of information on this topic, in Spain we have designed a cross-sectional survey to evaluate the potential impact of Medical School teaching on the final students' profiles, both in perceptions and expectations, and in the choice of specialty. Our hypothesis is that those Medical Schools with greater exposure to Family Practice will have students with more positive attitudes and perceptions than those with less. On the other hand we hypothesize that attitudes and perceptions will improve over time as students get exposed to Family Practice through their undergraduate years. Finally, given the actual situation of this specialty, in Spain and at the European level, with an increase in its inclusion in Medical Schools, we hypothesize that these attitudes and perceptions will also improve over time.

**METHODS**

This is a multicenter survey that will take place in Spanish Medical Schools. This proposal refers to the initial observation and the first follow-up after two years. Each survey will consist of two different questionnaires: one will be given to students in different courses of the Spanish Medical School undergraduate curricula, asking about their knowledge, perceptions and attitudes about Family Medicine. This questionnaire will be repeated every two years. The repetition will help exploring the evolution of the student cohort until the end of their undergraduate studies. The other questionnaire will

- Deleted: M
- Deleted: m
- Deleted: s
- Deleted: the student attends
- Deleted: ies
- Deleted:
- Deleted: <sup>22-24</sup>
- Deleted: generalists
- Deleted: m
- Deleted: s
- Deleted: m
- Deleted: s
- Deleted: <sup>25</sup>
- Deleted: For this reason a high percentage of students end up choosing a specialty that is closely related to the one they preferred when they entered Mmedical Sschool.
- Deleted: e
- Deleted: on
- Deleted: this subject
- Deleted: repetitive
- Deleted: that will allow us
- Deleted: m
- Deleted: s
- Deleted: profiles of
- Deleted: preceptions
- Deleted: Family
- Deleted: the
- Deleted: of Family Practice
- Deleted: ¶ ... [1]
- Deleted: m
- Deleted: s
- Deleted: follow-up
- Deleted: m
- Deleted: s
- Deleted: on P
- Deleted: Practice
- Deleted: C and FM
- Deleted: of the survey every t... [2]
- Deleted: allow for an analysis of
- Deleted: , as well as the chan... [3]

evaluate the educational activity related to Family Medicine in each center. This protocol was approved the Research Ethics Board at the IDIAP Jordi Gol, Barcelona.

BMJ Open

1  
2  
3  
4  
5  
6  
7  
8  
9  
10  
11  
12  
13  
14  
15  
16  
17  
18  
19  
20  
21  
22  
23  
24  
25  
26  
27  
28  
29  
30  
31  
32  
33  
34  
35  
36  
37  
38  
39  
40  
41  
42  
43  
44  
45  
46  
47  
48  
49

**Subjects**

The study subjects will be all students in the first, third and fifth year in all Spanish Medical Schools (approximately between 12,000 and 14,000 students). The rationale for choosing the third and fifth year is that in the third is when the students start clinical exposure, and in the fifth year they are in a more advanced situation from the clinical point of view. The first year will provide a baseline value. At the same time, a different survey will be addressed to the study's local coordinating faculty in each Medical School. Participation will be voluntary.

**Student questionnaire**

**Design of the questionnaire**

The instrument of measure will be a specifically designed questionnaire made up of a series of items that will be evaluated on a scale similar to a Likert scale, with some open questions. A list of items will be obtained from the literature review, such as attitudes, perceptions, specialty preference, and demographic characteristics. With these items we will develop the first version of the questionnaire. A pilot study will be done with students in different years of Medical School in Barcelona, Madrid, Alicante and Zaragoza in order to validate the questionnaire, evaluate its reliability, and verify that it is adequate and well accepted. The final version will be developed based on the results of the pilot study. The questionnaire will also collect information on the student characteristics that the literature review shows are related to attitudes and perceptions about Family Medicine.

**Data collection**

Data collection will take place close to the beginning of the second quarter of the academic year. The completion of the questionnaire will be done in the classroom, in

- Deleted: s
- Deleted: ask them about
- Deleted: Primary Care and
- Deleted: Practice
- Deleted: M
- Deleted:
- Deleted: one
- Deleted: The
- Formatted: Not Highlight
- Formatted: Not Highlight
- Deleted: local r
- Formatted: Not Highlight
- Deleted: e
- Formatted: Not Highlight
- Deleted: b
- Formatted: Not Highlight
- Formatted: English (U.K.)
- Deleted: of study of Medicine and Surgery
- Deleted: m
- Deleted: s
- Deleted: m
- Deleted: s
- Deleted: (1 or 2 faculty per school)
- Deleted: m
- Deleted: s
- Deleted: PC and FM
- Deleted: Practice
- Deleted: four-month period

### Questionnaire for local coordinators

In each Medical School there will be one or two faculty who will be the local coordinators of the study. These coordinators will answer a specific questionnaire about educational and other activities related to Primary Care, and Family Medicine, taking place in their local school during the academic year.

- Deleted: m
- Deleted: s
- Deleted: C
- Deleted: FM
- Deleted: Practice
- Deleted: that is
- Deleted: present

### Data analysis

A descriptive analysis of the answers will be undertaken, both by groups and individually, for each of the study years. Proportions will be used for categorical variables and means, and standard deviations for quantitative variables. Variability according to Medical School and study year will be analyzed, both via variability quotients and also by comparing the different strata with the Chi-squared test and analysis of variance.

- Deleted: m
- Deleted: s

The existence of an association between the questionnaire scores and each of its dimensions will also be analyzed by comparing the students' individual characteristics with the teaching activity related to Primary Care and Family Practice in the different Medical Schools. This analysis will use both bivariate procedures (Chi-squared test, analysis of variance) as well as multivariate ones. A multiple linear regression will be done, with the survey scores and dimension scores as dependent variables, and the rest of the variables being considered descriptive. The selection of variables will be done step by step from an initial model formed by variables with a bivariate association with dependent variables of  $p \leq 0.20$ . The dependent variables will then be dichotomized and the analysis will be repeated through logistic regression.

- Deleted: . This will be done by
- Deleted: looking at
- Deleted: and comparing them to
- Deleted: PC and FM
- Deleted: m
- Deleted: s

Alter the second survey two years later the same analyses will take place and in addition the evolution of the questionnaire scores and activity related to Primary Care and Family Medicine will be analyzed by comparing the results with those cohorts of students in the

- Deleted: Practice
- Deleted: PC and FM
- Deleted: of the

## DISCUSSION

The proposed study has been designed to evaluate the [aforementioned](#) characteristics at the beginning of medical training and throughout time. Given its sample size (number of [Medical Schools](#) and students) and the fact that it implies a follow-up of the students, this project will provide relevant [information, which](#) is presently not available in the international literature. The study takes place in the context of the changes due to the [Bologna Process](#) (<http://www.ond.vlaanderen.be/hogeronderwijs/bologna/>). The overarching aim of this [Process](#) is to create a European Higher Education Area (EHEA) based on international cooperation and academic exchange. There are changes taking place actually, due to [the Bologna Process](#) and to the general tendency in most [Medical Schools](#) to [introduce progressively](#) more teaching activities in Family [Medicine](#). The results of this study will generate in the next few years information about the evolution of knowledge, attitude and perceptions about [Family Medicine](#) as a specialty. They will also assist in analyzing the relation of different factors to perception and the final choice of [FM](#) as a specialty.

Deleted: forementioned

Deleted: m

Deleted: s

Deleted: information which

Deleted: Bologna

Deleted: e Bologna

Deleted: Bolgne

Deleted: m

Deleted: s

Deleted: start

Deleted: introducing some

Deleted: Practice

Deleted: Practice

Deleted: FM and PC

Deleted: amily Practice

Deleted: FM

## Study's limitations

The principal limitations of this study are related to its design. [First, given its observational nature the results observed should be considered hypothesis generating rather than conclusive. Our hypothesis is that at present, where there is a shortage of Family Medicine in University in our country, more Family Medicine training will improve attitudes and perceptions. If this is true, it is likely that given the actual circumstances and changes taking place in Family Medicine in Spain and the Bologna process across Europe, the increase in the presence of Family Practice will improve the attitudes and perceptions of students towards it. However, other factors, that we are unable to control](#)

Deleted: ,

Formatted: Font: Arial, Not Italic

Formatted: Font: Arial

Formatted: Font: Arial, Not Italic

Formatted: Font: Arial

Formatted: Font: Arial, Not Italic

Deleted: Bologna

Formatted: Font: Arial, Not Italic

Formatted: Font: Arial, Not Italic

introduces some degree of subjectivity.

Formatted: Font: Arial, Not Italic

Deleted: , and this

Secondly, the percentage of replies can be generally low, and also vary according to Medical School and specific items, which can introduce a bias. The role of the coordinating faculty in each Medical School is essential in order to reduce the number of unanswered questionnaires. Another difficulty, since the questionnaire is anonymous, is the impossibility of evaluating at an individual level the evolution over time of the assessed characteristics and dimensions.

Deleted: m

Deleted: s

Deleted: m

Deleted: s

### Study's strengths

The design of this study has various strengths. One of the principal ones is the completion of the questionnaire in the classroom, in paper format, during some of the students' training sessions. In this way we should obtain a high response rate, with few students not responding. In specific cases, when local circumstances make difficult to get the students together, it will also be possible to respond via the Internet. The research team for this study includes coordinating faculty from 22 of the 27 universities throughout Spain, which should bring the total number of surveyed individuals to over 10,000, making this the largest study on this subject internationally. This sample size and the expected high response rate will make the study be a representative assessment of the present situation in Spain.

Deleted: .

### Implications

This national survey will provide information on the attitudes and perceptions students in Medical Schools have of Family Medicine in the health system. It will also allow us to assess their attitude on its usefulness, and the need for specific training in Family Medicine at the undergraduate level. For these reasons we believe that the results of this study will provide valuable information for curriculum development related to Family Medicine in the different Schools of Medicine, and will help to prioritize those activities that will be most effective for promoting this specialty in Spain.

Deleted: primary care and the role of f

Deleted: practice

Deleted: Practice

Deleted: Practice

Deleted: PC and FM

Deleted: Practice

Deleted: PC

1  
2  
3  
4  
5  
6  
7  
8  
9  
10  
11  
12  
13  
14  
15  
16  
17  
18  
19  
20  
21  
22  
23  
24  
25  
26  
27  
28  
29  
30  
31  
32  
33  
34  
35  
36  
37  
38  
39  
40  
41  
42  
43  
44  
45  
46  
47  
48  
49

For peer review only

1. Barber TP, Lopez-Valcarcel B. Oferta y necesidad de médicos especialistas en España (2006-2030). Ministerio de Sanidad y Política Social. Departamento de Publicaciones. Madrid. 2009;4-154.

2. Martín Zurro A, Cano Pérez JF: Docencia en Atención Primaria y medicina de familia. En Atención Primaria. Conceptos, organización y práctica clínica. Martín Zurro A y Cano Pérez JF (eds). Elsevier España. 6ª edición del año 2008: 170-174.

3. Menárguez Puche JF, Tudela deGea MB, et al: Medicina de familia y Universidad, ¿cómo lo ven los estudiantes?. Aten Primaria 2010;42:303-4.

4. Bonal Pitz P, Casado Vicente V: La medicina de familia como disciplina académica y la atención primaria como entorno de aprendizaje. Aten Primaria 2004;34:433-6.

5. Graham R, Roberts RG, Ostergaard DJ, et al. Family Practice in the United States. A status report. JAMA 2002;288:1097-101.

6. Geyman JP, Bliss E. What does family practice need to do next? A cross-generational view. Fam Med 2001;33:259-67.

7. Sistema Nacional de Salud 2010. Anexo D. Datos y cifras. Ministerio de Sanidad y Política Social. Madrid; 2010:58-61.

8. Menarguez Puche JF, Gomez-Calcerrada D, Gonzalez Diaz M, et al: Undergraduate teaching of primary health care. A Delphi study. Aten Primaria 1992;10:876-9.

9. Zarco Montejo J. Situación de la medicina de familia en la universidad española y europea. Revista de la Sociedad Madrileña de Medicina de Familia y Comunitaria 2005;7:8-16.

7. De Lorenzo-Cáceres A, Otero A, Calvo E, et al. Contacto precoz del alumno con el paciente en atención primaria. Una experiencia de aprendizaje basada en la resolución de problemas. Educación Médica 1998;1:24-31

8. De Lorenzo-Caceres A, Otero A, Calvo Corbella E. Clinical practice for medical students at health centres: teaching possibilities of the web at the Unit of Family Medicine and Primary Care of the Autonomous University of Madrid. Aten Primaria 2005;35:372-4

9. Gil VF, Quirce F, Orozco D, et al. Opinion of university professors on the suitability of specific primary care training in medical students. Aten Primaria 1995;15:179-82.

are or fewer/ Suriname AB, Suriname CD.  
 Article title. Journal abbreviation  
 Year;Vol:Start page-End page. (see ... [4])

Formatted ... [5]  
 Formatted: Bullets and Numbering  
 Deleted: Barber  
 Deleted: Pérez  
 Deleted: P, González  
 Deleted: López-Valcarcel  
 Deleted: B: Oferta y necesidad ... [6]  
 Formatted: Font: Not Bold  
 Deleted: ¶  
 Formatted ... [7]  
 Formatted: Font: Not Bold  
 Deleted: 5ª  
 Formatted ... [8]  
 Deleted: <#>. Madrid ; 2003.¶  
 Formatted: Bullets and Numbering  
 Deleted: Hernández Sánchez ... [9]  
 Formatted ... [10]  
 Formatted ... [11]  
 Deleted: Kahn NB, Pugno P ... [12]  
 Formatted ... [13]  
 Deleted: ¶  
 Formatted: Bullets and Numbering  
 Field Code Changed ... [14]  
 Formatted ... [15]  
 Deleted: ¶  
 Formatted: Bullets and Numbering  
 Formatted: Font: Not Bold  
 Deleted: ¶  
 Formatted: Bullets and Numbering  
 Deleted: Berrocal ... Saura L ... [16]  
 Formatted ... [17]  
 Deleted: :  
 Formatted ... [18]  
 Deleted: Engel JL...: ... [19]  
 Formatted ... [20]  
 Formatted ... [21]  
 Formatted ... [22]  
 Deleted: Uris J, Simon-Taler ... [23]  
 Formatted ... [24]



11. Escobar F, López-Torres J. ¿Qué características de los estudiantes de medicina se relacionan con mejores conocimientos y actitudes hacia la medicina de familia? *Aten Primaria* 2009; 41:431-6.

Deleted: . [Epub ahead of print] ... [25]

Deleted: Rabadán ...Hidalgo ... [26]

Formatted ... [27]

12. Garrett EA, Dietrich AJ. Students' evolving attitudes toward family medicine and specialty choices at one medical school. *Acad Med* 1991;66:625-7.

Formatted ... [28]

13. Grayson MS, Newton DA, Whitley TW. First-year medical students' knowledge of and attitudes toward primary care careers. *Fam Med* 1996;28:337-42.

Formatted ... [29]

14. Lynch DC, Newton DA, Grayson MS, et al. Influence of medical school on medical students' opinions about primary care practice. *Acad Med* 1998;73:433-5.

Deleted: Whitley TW

Formatted ... [30]

15. Henderson E, Berlin A, Fuller J. Attitude of medical students towards general practice and general practitioners. *Br J Gen Pract* 2002;52:359-63.

Formatted ... [31]

16. Wright B, Scott I, Woloschuk W, Brenneis F. Career choice of new medical students at three Canadian universities: family medicine versus specialty medicine. *CMAJ* 2004;170:1920-4

Deleted: Ian ...Wayne ...Fra ... [32]

Formatted ... [33]

17. Miettola J, Mantyselka P, Vaskilampi T. Doctor-patient interaction in Finnish primary health care as perceived by first year medical students. *BMC Med Educ* 2005;5:34.

Formatted ... [34]

18. Ochoa-Diaz H. Medical curricula and students' attitudes towards general and family practice in Mexico. *Med Educ* 1987;21:189-98.

Deleted: Lopez

Formatted ... [35]

19. Morrison JM, Murray TS. Career preferences of medical students: influence of a new four-week attachment in general practice. *Br J Gen Pract* 1996;46:721-5

Formatted ... [36]

20. Kalantan K, Pyrne N, Al-Faris E, et al. Students' perceptions towards a family medicine attachment experience. *Educ Health (Abingdon)* 2003;16:357-65.

Formatted: Spanish (Spain-Modern Sort)

Deleted: Al-Taweel A, Al-Rowais N, Abdul Ghani H, Eldin Magzoub M

21. Williamson M, Gormley A, Bills J, et al. The new rural health curriculum at Dunedin School of Medicine: how has it influenced the attitudes of medical students to a career in rural general practice? *N Z Med J* 2003;116:U537.

Formatted ... [37]

Deleted: Farry P

Formatted ... [38]

22. Bunker J, Shadbolt N. Choosing general practice as a career. The influences of education and training. *Aust Fam Physician* 2009; 38: 341-3.

Formatted: Font: Arial, English (U.K.)

Formatted: Justified

Formatted: Bullets and Numbering

Formatted ... [39]



- 1  
2  
3  
4  
5  
6  
7  
8  
9  
10  
11  
12  
13  
14  
15  
16  
17  
18  
19  
20  
21  
22  
23  
24  
25  
26  
27  
28  
29  
30  
31  
32  
33  
34  
35  
36  
37  
38  
39  
40  
41  
42  
43  
44  
45  
46  
47  
48  
49
24. Mann MP. Attitudes toward and subsequent career choice of family practice: a weak relationship. *Fam Med* 1994;**26**:504-8.
25. Senf JH, Campos-Outcalt D, Kutob R. Factors related to the choice of family medicine: a reassessment and literature review. *J Am Board Fam Pract* 2003;**16**:502-12.
26. Tolhurst H, Stewart M. Becoming a GP--a qualitative study of the career interests of medical students. *Aust Fam Physician* 2005;**34**:204-6.

Formatted: Font: Bold

Formatted: Font: Arial, English (U.K.)

Formatted: Font: Not Bold

Formatted: Font: Not Italic

Formatted: Font: Not Bold

Formatted: Font: Not Italic

Deleted: Nov-Dec

Formatted: Font: Not Bold

Formatted: Font: Not Italic

Deleted: <#>Henderson E, Berlin A, Fuller J, Attitude of medical students towards general practice and general practitioners. *Br J Gen Pract* 2002;**52**:359-63

Formatted: Font: Not Italic

1  
2  
3  
4  
5  
6  
7  
8  
9  
10  
11  
12  
13  
14  
15  
16  
17  
18  
19  
20  
21  
22  
23  
24  
25  
26  
27  
28  
29  
30  
31  
32  
33  
34  
35  
36  
37  
38  
39  
40  
41  
42  
43  
44  
45  
46  
47  
48  
49

For peer review only

**Figure legends****Figure 1. Study design flowchart****Abbreviations and definitions**

FM: family medicine

Family medicine: Family medicine is normally the point of first medical contact within the health care system, providing open and unlimited access to its users, dealing with all health problems regardless of the age, sex, or any other characteristic of the person concerned (WONCA, Europe. The European Definition of General Practice/Family Medicine. 2002).

Deleted: ¶

Deleted: PC: primary care,

Deleted: Primary care: initial point of consultation for patients in a national health care organisation. The professionals involved usually include family physicians, nurses and pediatricians. Sometimes some primary care centres include other specialist like midwives, gynaecologist, cardiologist, endocrinologist or others.¶

Deleted: onca

**Competing interests**

The authors declare that they have no competing interests.

**Authors' contributions**

AMZ, JJV and PAC participated in the conception and design of the protocol and drafted a first version. AMH, XMT and AOP participated in the design and provided important intellectual content to the first draft. All authors participated, revising it critically for important intellectual content and have given final approval of the version to be published.

Formatted: Font: (Default) Arial, 12 pt

Deleted: AMZ, JJV and PAC participated in the conception and design of the protocol and drafted a first version. All authors participated, revising it critically for important intellectual content and have given final approval of the version to be published. ¶

**Acknowledgements**

We would like to thank Carmen Llenas for her help with the running of the study.

**Sources of funding**

1  
2  
3  
4  
5  
6  
7  
8  
9  
10  
11  
12  
13  
14  
15  
16  
17  
18  
19  
20  
21  
22  
23  
24  
25  
26  
27  
28  
29  
30  
31  
32  
33  
34  
35  
36  
37  
38  
39  
40  
41  
42  
43  
44  
45  
46  
47  
48  
49

For peer review only

1  
2  
3 **Page 7: [1] Deleted** **Unknown**

4  
5  
6  
7  
8 **Page 7: [2] Deleted** **PAlonso** **9/22/2011 11:26:00 AM**  
9 of the survey every two years

10  
11 **Page 7: [3] Deleted** **PAlonso** **9/22/2011 11:27:00 AM**  
12 , as well as the changes in those that are beginning their study

13  
14 **Page 13: [4] Deleted** **PAlonso** **9/22/2011 10:34:00 AM**  
15 1 (list 3 authors et al if there are or fewer) Surname AB, Surname CD. Article title. Journal abbreviation  
16 Year;Vol:Start page-End page. (see punctuation and no month after year of publication)  
17 Koziol-Mclain J, Brand D, Morgan D, et al. Measuring injury risk factors: question  
18 reliability in a statewide sample. Inj Prev 2000;6:148–50.

19  
20  
21  
22  
23  
24  
25  
26 **Page 13: [5] Formatted** **PAlonso** **9/22/2011 10:35:00 AM**  
27 Font: Arial

28  
29 **Page 13: [5] Formatted** **PAlonso** **9/22/2011 10:35:00 AM**  
30 Font: Arial, 12 pt

31  
32 **Page 13: [6] Deleted** **PAlonso** **9/22/2011 10:34:00 AM**  
33 B: Oferta y necesidad de especialistas médicos en España (2008-2025).  
34 Ministerio de Sanidad y Consumo; Marzo 2009

35  
36  
37 **Page 13: [7] Formatted** **PAlonso** **9/22/2011 10:35:00 AM**  
38 Indent: Left: 0 pt, Hanging: 14.2 pt, Numbered + Level: 1 + Numbering Style: 1, 2, 3,  
39 ... + Start at: 1 + Alignment: Left + Aligned at: 0 pt + Tab after: 0 pt + Indent at: 18 pt

40  
41 **Page 13: [8] Formatted** **PAlonso** **9/22/2011 10:35:00 AM**  
42 Font: Arial, 12 pt

43  
44 **Page 13: [8] Formatted** **PAlonso** **9/22/2011 10:35:00 AM**  
45 Font: Arial

46 **Page 13: [9] Deleted** **eas** **9/21/2011 1:41:00 PM**  
47 Hernández Sánchez JM, García-Estañ J

48  
49 **Page 13: [10] Formatted** **eas** **9/21/2011 11:19:00 AM**  
50 Font: Not Bold

51  
52 **Page 13: [10] Formatted** **eas** **9/21/2011 11:19:00 AM**  
53 Font: Not Italic

54  
55 **Page 13: [11] Formatted** **eas** **9/21/2011 11:19:00 AM**  
56 Font: Not Bold

57  
58 **Page 13: [11] Formatted** **eas** **9/21/2011 11:19:00 AM**  
59  
60

1  
2  
3  
4  
5  
6  
7  
8  
9  
10  
11  
12  
13  
14  
15  
16  
17  
18  
19  
20  
21  
22  
23  
24  
25  
26  
27  
28  
29  
30  
31  
32  
33  
34  
35  
36  
37  
38  
39  
40  
41  
42  
43  
44  
45  
46  
47  
48  
49  
50  
51  
52  
53  
54  
55  
56  
57  
58  
59  
60

Font: Not Italic

|                              |            |                             |
|------------------------------|------------|-----------------------------|
| <b>Page 13: [12] Deleted</b> | <b>eas</b> | <b>9/21/2011 1:42:00 PM</b> |
|------------------------------|------------|-----------------------------|

Kahn NB, Pugno PA, Green LA

|                                |            |                              |
|--------------------------------|------------|------------------------------|
| <b>Page 13: [13] Formatted</b> | <b>eas</b> | <b>9/21/2011 11:19:00 AM</b> |
|--------------------------------|------------|------------------------------|

Font: Not Bold

|                                |            |                              |
|--------------------------------|------------|------------------------------|
| <b>Page 13: [13] Formatted</b> | <b>eas</b> | <b>9/21/2011 11:19:00 AM</b> |
|--------------------------------|------------|------------------------------|

Font: Not Italic

|                             |                |  |
|-----------------------------|----------------|--|
| <b>Page 13: [14] Change</b> | <b>Unknown</b> |  |
|-----------------------------|----------------|--|

Field Code Changed

|                             |                |  |
|-----------------------------|----------------|--|
| <b>Page 13: [14] Change</b> | <b>Unknown</b> |  |
|-----------------------------|----------------|--|

Field Code Changed

|                                |            |                              |
|--------------------------------|------------|------------------------------|
| <b>Page 13: [15] Formatted</b> | <b>eas</b> | <b>9/21/2011 11:19:00 AM</b> |
|--------------------------------|------------|------------------------------|

Font: Not Bold

|                                |            |                              |
|--------------------------------|------------|------------------------------|
| <b>Page 13: [15] Formatted</b> | <b>eas</b> | <b>9/21/2011 11:19:00 AM</b> |
|--------------------------------|------------|------------------------------|

Font: Not Italic

|                              |            |                             |
|------------------------------|------------|-----------------------------|
| <b>Page 13: [16] Deleted</b> | <b>eas</b> | <b>9/21/2011 1:43:00 PM</b> |
|------------------------------|------------|-----------------------------|

Berrocal

|                              |            |                             |
|------------------------------|------------|-----------------------------|
| <b>Page 13: [16] Deleted</b> | <b>eas</b> | <b>9/21/2011 1:43:00 PM</b> |
|------------------------------|------------|-----------------------------|

Saura Llamas J

|                                |            |                              |
|--------------------------------|------------|------------------------------|
| <b>Page 13: [17] Formatted</b> | <b>eas</b> | <b>9/21/2011 11:19:00 AM</b> |
|--------------------------------|------------|------------------------------|

Font: Not Bold

|                                |            |                              |
|--------------------------------|------------|------------------------------|
| <b>Page 13: [17] Formatted</b> | <b>eas</b> | <b>9/21/2011 11:19:00 AM</b> |
|--------------------------------|------------|------------------------------|

Font: Not Italic

|                                |            |                              |
|--------------------------------|------------|------------------------------|
| <b>Page 13: [18] Formatted</b> | <b>eas</b> | <b>9/21/2011 11:19:00 AM</b> |
|--------------------------------|------------|------------------------------|

Font: Not Bold

|                                |            |                              |
|--------------------------------|------------|------------------------------|
| <b>Page 13: [18] Formatted</b> | <b>eas</b> | <b>9/21/2011 11:19:00 AM</b> |
|--------------------------------|------------|------------------------------|

Font: Not Italic

|                              |            |                             |
|------------------------------|------------|-----------------------------|
| <b>Page 13: [19] Deleted</b> | <b>eas</b> | <b>9/21/2011 1:43:00 PM</b> |
|------------------------------|------------|-----------------------------|

Engel JL

|                              |            |                             |
|------------------------------|------------|-----------------------------|
| <b>Page 13: [19] Deleted</b> | <b>eas</b> | <b>9/21/2011 1:44:00 PM</b> |
|------------------------------|------------|-----------------------------|

:

|                                |            |                              |
|--------------------------------|------------|------------------------------|
| <b>Page 13: [20] Formatted</b> | <b>eas</b> | <b>9/21/2011 11:19:00 AM</b> |
|--------------------------------|------------|------------------------------|

Font: Not Bold

|                                |            |                              |
|--------------------------------|------------|------------------------------|
| <b>Page 13: [20] Formatted</b> | <b>eas</b> | <b>9/21/2011 11:19:00 AM</b> |
|--------------------------------|------------|------------------------------|

Font: Not Italic

|                                |            |                              |
|--------------------------------|------------|------------------------------|
| <b>Page 13: [21] Formatted</b> | <b>eas</b> | <b>9/21/2011 11:19:00 AM</b> |
|--------------------------------|------------|------------------------------|

Font: Not Bold

|                                |            |                              |
|--------------------------------|------------|------------------------------|
| <b>Page 13: [21] Formatted</b> | <b>eas</b> | <b>9/21/2011 11:19:00 AM</b> |
|--------------------------------|------------|------------------------------|

Font: Not Italic

|    |                                  |            |                              |
|----|----------------------------------|------------|------------------------------|
| 1  |                                  |            |                              |
| 2  |                                  |            |                              |
| 3  | <b>Page 13: [22] Formatted</b>   | <b>eas</b> | <b>9/21/2011 1:44:00 PM</b>  |
| 4  | Spanish (Spain-Modern Sort)      |            |                              |
| 5  |                                  |            |                              |
| 6  | <b>Page 13: [23] Deleted</b>     | <b>eas</b> | <b>9/21/2011 1:44:00 PM</b>  |
| 7  | Uris J, Simon-Talero M, Merino J |            |                              |
| 8  |                                  |            |                              |
| 9  | <b>Page 13: [24] Formatted</b>   | <b>eas</b> | <b>9/21/2011 11:19:00 AM</b> |
| 10 | Font: Not Bold                   |            |                              |
| 11 |                                  |            |                              |
| 12 | <b>Page 13: [24] Formatted</b>   | <b>eas</b> | <b>9/21/2011 11:19:00 AM</b> |
| 13 | Font: Not Italic                 |            |                              |
| 14 |                                  |            |                              |
| 15 | <b>Page 14: [25] Formatted</b>   | <b>eas</b> | <b>9/21/2011 1:52:00 PM</b>  |
| 16 | Font: Not Bold                   |            |                              |
| 17 |                                  |            |                              |
| 18 | <b>Page 14: [25] Formatted</b>   | <b>eas</b> | <b>9/21/2011 1:52:00 PM</b>  |
| 19 | Font: Not Italic                 |            |                              |
| 20 |                                  |            |                              |
| 21 | <b>Page 14: [25] Formatted</b>   | <b>eas</b> | <b>9/21/2011 1:52:00 PM</b>  |
| 22 | Not Highlight                    |            |                              |
| 23 |                                  |            |                              |
| 24 | <b>Page 14: [25] Formatted</b>   | <b>eas</b> | <b>9/21/2011 1:52:00 PM</b>  |
| 25 | Font: Bold, Not Highlight        |            |                              |
| 26 |                                  |            |                              |
| 27 | <b>Page 14: [25] Formatted</b>   | <b>eas</b> | <b>9/21/2011 1:52:00 PM</b>  |
| 28 | Not Highlight                    |            |                              |
| 29 |                                  |            |                              |
| 30 | <b>Page 14: [26] Deleted</b>     | <b>eas</b> | <b>9/21/2011 1:45:00 PM</b>  |
| 31 | Rabadán                          |            |                              |
| 32 |                                  |            |                              |
| 33 | <b>Page 14: [26] Deleted</b>     | <b>eas</b> | <b>9/21/2011 1:45:00 PM</b>  |
| 34 | Hidalgo                          |            |                              |
| 35 |                                  |            |                              |
| 36 | <b>Page 14: [27] Formatted</b>   | <b>eas</b> | <b>9/21/2011 11:19:00 AM</b> |
| 37 | Font: Not Bold                   |            |                              |
| 38 |                                  |            |                              |
| 39 | <b>Page 14: [27] Formatted</b>   | <b>eas</b> | <b>9/21/2011 11:19:00 AM</b> |
| 40 | Font: Not Italic                 |            |                              |
| 41 |                                  |            |                              |
| 42 | <b>Page 14: [28] Formatted</b>   | <b>eas</b> | <b>9/21/2011 11:19:00 AM</b> |
| 43 | Font: Not Bold                   |            |                              |
| 44 |                                  |            |                              |
| 45 | <b>Page 14: [28] Formatted</b>   | <b>eas</b> | <b>9/21/2011 11:19:00 AM</b> |
| 46 | Font: Not Italic                 |            |                              |
| 47 |                                  |            |                              |
| 48 | <b>Page 14: [29] Formatted</b>   | <b>eas</b> | <b>9/21/2011 11:19:00 AM</b> |
| 49 | Font: Not Bold                   |            |                              |
| 50 |                                  |            |                              |
| 51 | <b>Page 14: [29] Formatted</b>   | <b>eas</b> | <b>9/21/2011 11:19:00 AM</b> |
| 52 | Font: Not Italic                 |            |                              |
| 53 |                                  |            |                              |
| 54 | <b>Page 14: [30] Formatted</b>   | <b>eas</b> | <b>9/21/2011 11:19:00 AM</b> |
| 55 | Font: Not Bold                   |            |                              |
| 56 |                                  |            |                              |
| 57 | <b>Page 14: [30] Formatted</b>   | <b>eas</b> | <b>9/21/2011 11:19:00 AM</b> |
| 58 | Font: Not Italic                 |            |                              |
| 59 |                                  |            |                              |
| 60 | <b>Page 14: [31] Formatted</b>   | <b>eas</b> | <b>9/21/2011 11:19:00 AM</b> |
|    | Font: Not Bold                   |            |                              |

1  
2  
3 **Page 14: [31] Formatted** eas 9/21/2011 11:19:00 AM

4 Font: Not Italic

5  
6 **Page 14: [32] Deleted** eas 9/21/2011 1:49:00 PM

7 lan

8  
9 **Page 14: [32] Deleted** eas 9/21/2011 1:49:00 PM

10 Wayne

11  
12 **Page 14: [32] Deleted** eas 9/21/2011 1:49:00 PM

13 Fraser

14  
15  
16 **Page 14: [33] Formatted** eas 9/21/2011 11:19:00 AM

17 Font: Not Bold

18  
19 **Page 14: [33] Formatted** eas 9/21/2011 1:50:00 PM

20 Font: Not Italic, English (U.K.)

21  
22 **Page 14: [33] Formatted** eas 9/21/2011 1:50:00 PM

23 English (U.K.)

24  
25 **Page 14: [34] Formatted** eas 9/21/2011 11:19:00 AM

26 Font: Not Bold

27  
28 **Page 14: [34] Formatted** eas 9/21/2011 11:19:00 AM

29 Font: Not Italic

30  
31 **Page 14: [35] Formatted** eas 9/21/2011 11:19:00 AM

32 Font: Not Bold

33  
34 **Page 14: [35] Formatted** eas 9/21/2011 11:19:00 AM

35 Font: Not Italic

36  
37 **Page 14: [36] Formatted** eas 9/21/2011 11:19:00 AM

38 Font: Not Bold

39  
40 **Page 14: [36] Formatted** eas 9/21/2011 11:19:00 AM

41 Font: Not Italic

42  
43 **Page 14: [37] Formatted** eas 9/21/2011 11:19:00 AM

44 Font: Not Bold

45  
46 **Page 14: [37] Formatted** eas 9/21/2011 11:19:00 AM

47 Font: Not Italic

48  
49 **Page 14: [37] Formatted** eas 9/21/2011 11:19:00 AM

50 Font: Not Italic

51  
52 **Page 14: [38] Formatted** eas 9/21/2011 11:19:00 AM

53 Font: Not Bold

54  
55 **Page 14: [38] Formatted** eas 9/21/2011 11:19:00 AM

56 Font: Not Italic

57  
58 **Page 14: [38] Formatted** eas 9/21/2011 11:19:00 AM

59 English (U.K.)

60  
**Page 14: [39] Formatted** eas 9/21/2011 1:51:00 PM

Font: Arial, Bold, English (U.K.)



1  
2  
3 **Page 14: [39] Formatted** **eas** **9/21/2011 11:19:00 AM**

4 Font: Arial, English (U.K.)

5  
6 **Page 14: [39] Formatted** **eas** **9/21/2011 11:19:00 AM**

7 Font: 12 pt, English (U.K.)  
8  
9  
10  
11  
12  
13  
14  
15  
16  
17  
18  
19  
20  
21  
22  
23  
24  
25  
26  
27  
28  
29  
30  
31  
32  
33  
34  
35  
36  
37  
38  
39  
40  
41  
42  
43  
44  
45  
46  
47  
48  
49  
50  
51  
52  
53  
54  
55  
56  
57  
58  
59  
60

For peer review only
